# Supplementary material for: Dissection of Superior Alleles for Yield-Related Traits and Their Distribution in Important Cultivars of Wheat by Association Mapping
Source: PubMed Central journal article supplement (PMC7061769; doi:10.3389/fpls.2020.00175), 2020-03-02
Supplement: DataSheet_1.pdf [file DataSheet_1.pdf]

**TABLE S1** Information of the 384 wheat accessions used in this study.

| Accession No. | Name           | Origin   | Type | Accession No. | Name               | Origin  | Type |
|---------------|----------------|----------|------|---------------|--------------------|---------|------|
| MY000161      | Abbondanza     | Italy    | F    | ZM016154      | Yu822367(white)    | Henan   |      |
| MY000898      | Early Piemium  | America  | F    | ZM016182      | Yubao10            | Henan   |      |
| MY001072      | Funo           | Italy    | F    | ZM016194      | Xuchang26          | Henan   |      |
| MY001759      | Lovrin10       | Romania  | F    | ZM016196      | Huapei726          | Henan   |      |
| MY002004      | Mexipak66      | Pakistan | F    | ZM017931      | Yucheng851         | Henan   |      |
| MY002255      | Orofen         | Chile    | F    | ZM017939      | Zhengzhou743       | Henan   |      |
| ZM002798      | Youzimai       | Shaanxi  | F    | ZM017950      | Xinyang1           | Henan   |      |
| ZM004160      | Mazhamai       | Shaanxi  | F    | ZM017958      | Yanshi4            | Henan   |      |
| ZM005871      | Jiangdongmen   | Jiangsu  | F    | ZM022851      | Guangyang821       | Henan   |      |
| ZM008963      | Beijing8       | Shaanxi  | F    | ZM022863      | Hua850512          | Henan   |      |
| ZM010450      | Fan6           | Sichuan  | F    | ZM022870      | Hua886531          | Henan   |      |
| ZM015830      | Aimengniu      | Shandong | F    | ZM022904      | Zheng87302-0-12-A  | Henan   |      |
| ZM017079      | Xiaoyan6       | Shaanxi  | F    | ZM022915      | Zhengzhou871       | Henan   |      |
| ZM009378      | Yanda1817      | Beijing  | F    | ZM022916      | Zhengzhou872       | Henan   |      |
| ZM010176      | Nanda2419      | Jiangsu  | F    | ZM022972      | Yutong286          | Henan   |      |
|               | Wuyimai        | Sichuan  | F    | ZM022975      | Yumai10            | Henan   |      |
| ZM009594      | Bima4          | Shaanxi  | F    | ZM022994      | Nanzhao76144-0-6-1 | Henan   |      |
| ZM009597      | Xinong6028     | Shaanxi  | F    | ZM025399      | Wenmai8            | Henan   |      |
| ZM022235      | Yangmai158     | Yangzhou | W    | ZM025464      | Zhengzhou9285      | Henan   |      |
| ZM022978      | Yumai18        | Yangzhou | W    |               | Zhengmai9023       | Henan   |      |
| ZM013850      | Jimai30        | Shandong | W    | MY003143      | Wilhelmina         | Holland |      |
| ZM025984      | Jimai26        | Shandong | W    | ZM010314      | Emai6              | Hubei   |      |
| ZM009523      | Neixiang5      | Henan    | W    | ZM011384      | Jingguangmai       | Hubei   |      |
| ZM009101      | Shijiazhuang54 | Hebei    | W    | ZM016219      | Huazhong6          | Hubei   |      |
| ZM009391      | Jinan2         | Shandong | W    | ZM016330      | E1161              | Hubei   |      |
| ZM009405      | Taishan1       | Shandong | W    | ZM016368      | E26046             | Hubei   |      |
| ZM009591      | Bima1          | Shaanxi  | W    | ZM016373      | E31846             | Hubei   |      |
| ZM017936      | Bainong3217    | Henan    | W    | ZM016378      | E34963             | Hubei   |      |
| ZM017970      | Yumai7         | Henan    | W    | ZM016503      | Emai9              | Hubei   |      |
| ZM022977      | Yumai17        | Henan    | W    | ZM016512      | Xiangmai5          | Hubei   |      |
| ZM025939      | Xi'an8         | Shaanxi  | W    | ZM016597      | Xiangnong3099      | Hubei   |      |
| ZM010216      | Xuzhou14       | Jiangsu  | W    | ZM016606      | Xiangmai10         | Hubei   |      |
| MY002455      | Quality        | America  | W    | ZM023015      | JingzhouHXB7561-16 | Hubei   |      |
| ZM010261      | Anhui3         | Anhui    |      | ZM018051      | Xiang 675-1        | Hunan   |      |
| ZM010279      | Anhui9         | Anhui    |      | ZM018104      | Xiang 1445         | Hunan   |      |
| ZM010280      | Anhui10        | Anhui    |      | MY002540      | Rieti 75           | Italy   |      |
| ZM015308      | Wo80           | Anhui    |      | MY003078      | Virgilio           | Italy   |      |
| ZM015479      | Mengke3C       | Anhui    |      | ZM009472      | Zhengyin1          | Italy   |      |
| ZM015488      | Ai73           | Anhui    |      |               | Zhengyin4          | Italy   |      |
|               | Wanmai18       | Anhui    |      | ZM010186      | Nannongdaheimang   | Jiangsu |      |
| ZM008933      | Jinghong4      | Beijing  |      | ZM010187      | Zhongshan2         | Jiangsu |      |

|          |               |         |          |                 |         |
|----------|---------------|---------|----------|-----------------|---------|
| ZM008936 | Jinghong8     | Beijing | ZM010194 | Ningmai3        | Jiangsu |
| ZM008937 | Jinghong9     | Beijing | ZM010197 | Aiganzao        | Jiangsu |
| ZM008958 | Huabei187     | Beijing | ZM010211 | Nanda8          | Jiangsu |
| ZM008960 | Huabei672     | Beijing | ZM010217 | Xuzhou15        | Jiangsu |
| ZM008961 | Beijing6      | Beijing | ZM010221 | Xinfeng13       | Jiangsu |
| ZM008965 | Beijing10     | Beijing | ZM010228 | Huaiyin69-6     | Jiangsu |
| ZM008966 | Beijing11     | Beijing | ZM010240 | Sumai1          | Jiangsu |
| ZM008967 | Beijing12     | Beijing | ZM010241 | Sumai2          | Jiangsu |
| ZM008968 | Beijing13     | Beijing | ZM010242 | Sumai3          | Jiangsu |
| ZM008969 | Beijing14     | Beijing | ZM010243 | Wangmai15       | Jiangsu |
| ZM008975 | Beijing16     | Beijing | ZM010244 | Wangmai17       | Jiangsu |
| ZM008978 | Jingzuo208    | Beijing | ZM010245 | Wangmai19       | Jiangsu |
| ZM008979 | Jingzuo210    | Beijing | ZM010247 | Qunzhong42      | Jiangsu |
| ZM008982 | Jingzuo236    | Beijing | ZM010250 | Zhen7495        | Jiangsu |
| ZM008984 | Jingzuo278    | Beijing | ZM014785 | Fan415          | Jiangsu |
| ZM009014 | Nongda45      | Beijing | ZM014848 | Ningmai6        | Jiangsu |
| ZM009018 | Nongda139     | Beijing | ZM014889 | Ningai8628      | Jiangsu |
| ZM009027 | Nongda183     | Beijing | ZM014902 | Yangmai4        | Jiangsu |
| ZM009028 | Nongda311     | Beijing | ZM014926 | Suyang8-1-2     | Jiangsu |
| ZM009035 | Dai179        | Beijing | ZM014971 | Suzhou7829      | Jiangsu |
| ZM009042 | Kedong81      | Beijing | ZM014972 | Suzhou7906      | Jiangsu |
| ZM009043 | Kedong83      | Beijing | ZM014977 | Suzhou7940      | Jiangsu |
| ZM009052 | Kechun5       | Beijing | ZM014978 | Suzhou7946      | Jiangsu |
| ZM009053 | Kechun14      | Beijing | ZM014981 | Suzhou8332      | Jiangsu |
| ZM009057 | Youmangbai2   | Beijing | ZM015036 | Jinling1        | Jiangsu |
| ZM009059 | Youmangbai4   | Beijing | ZM015098 | Xuan7           | Jiangsu |
| ZM009063 | Youmangbai15  | Beijing | ZM015104 | Xuzhou20        | Jiangsu |
| ZM009068 | Youmanghong7  | Beijing | ZM015126 | Jian37          | Jiangsu |
| ZM009069 | Youmanghong8  | Beijing | ZM015139 | Zhen7630        | Jiangsu |
| ZM009070 | Youmanghong18 | Beijing | ZM022203 | Jurong03        | Jiangsu |
| ZM009087 | Dongbaita1    | Beijing | ZM022216 | Ningfengxiaomai | Jiangsu |
| ZM013099 | Fengkang1     | Beijing | ZM022311 | Xuzhou8785      | Jiangsu |
| ZM013100 | Fengkang2     | Beijing | ZM024954 | Nannongda96C076 | Jiangsu |
| ZM013102 | Fengkang4     | Beijing | ZM024955 | Nannongda96C181 | Jiangsu |
| ZM013103 | Fengkang5     | Beijing | ZM025004 | Ningmaizi32     | Jiangsu |
| ZM013105 | Fengkang7     | Beijing | ZM025075 | Yang92-90       | Jiangsu |
| ZM013106 | Fengkang8     | Beijing | ZM025137 | Yangmai9        | Jiangsu |
| ZM013107 | Fengkang9     | Beijing | ZM025175 | Zhenmai1        | Jiangsu |
| ZM013108 | Fengkang10    | Beijing | ZM026690 | Ningmai8        | Jiangsu |
| ZM013109 | Jingnong79-13 | Beijing | ZM026691 | Ningmai9        | Jiangsu |
| ZM013113 | Fengkang15    | Beijing | ZM026711 | Yangmai10       | Jiangsu |
| ZM013239 | Beijing5      | Beijing | ZM026712 | Yangmai11       | Jiangsu |
| ZM013330 | Nongda198     | Beijing | ZM026713 | Yangmai12       | Jiangsu |
| ZM013361 | Jingshuang16  | Beijing | ZM026714 | Yangmai13       | Jiangsu |

|          |                      |          |          |                       |         |
|----------|----------------------|----------|----------|-----------------------|---------|
| ZM013370 | Jingdong1            | Beijing  | ZM026715 | Yangmai14             | Jiangsu |
| ZM013398 | Jinghua1             | Beijing  | ZM026716 | Yangmai15             | Jiangsu |
| ZM013404 | Jingwang9            | Beijing  | ZM026717 | Yangmai16             | Jiangsu |
| ZM013405 | Jingchun70-5321      | Beijing  | ZM026718 | Yangmai17             | Jiangsu |
| ZM020970 | Beijing841           | Beijing  | ZM026800 | Suyang6               | Jiangsu |
| ZM020971 | Beijing8694          | Beijing  | ZM010306 | Wannian2              | Jiangxi |
| ZM020984 | Jing411              | Beijing  | ZM024056 | Fengqiang7            | Jilin   |
| ZM020985 | Jing437              | Beijing  | ZM017837 | Neixiang14            | Neimeng |
| MY001472 | Jubileina I          | Bulgaria | ZM010114 | Xiangnong3            | Qinghai |
| MY001473 | Jubileina II         | Bulgaria | ZM023615 | Gahai1                | Qinghai |
| MY009460 | 448                  | Foreign  | MY001760 | Lovrin13              | Romania |
| MY000945 | Etoile de Choisy     | France   | MY001761 | Lovrin18              | Romania |
| ZM010362 | Fufan17              | Fujian   | MY003379 | CkopocneJlka JI-1     | Russia  |
| ZM010368 | Dixiuzaao            | Fujian   | ZM009568 | Shannong17            | Shaanxi |
| ZM010370 | Baimangmai           | Fujian   | ZM009578 | Qingchun2             | Shaanxi |
| ZM010374 | Jinmai33             | Fujian   | ZM009580 | Zhuyeqing(white)      | Shaanxi |
| ZM010384 | Pumai1               | Fujian   | ZM009581 | Zhuyeqing(red)        | Shaanxi |
| ZM010392 | Ningmai1             | Fujian   | ZM009592 | Bima2                 | Shaanxi |
| ZM015503 | Jia35                | Fujian   | ZM009595 | Bima5                 | Shaanxi |
| ZM015540 | Funong50002          | Fujian   | ZM009596 | Bima6                 | Shaanxi |
| ZM015545 | Funong60112          | Fujian   | ZM009607 | Xiaoyan4              | Shaanxi |
| ZM015557 | Fufan16              | Fujian   | ZM009614 | Pulin5                | Shaanxi |
| ZM009802 | Ganmai7              | Gansu    | ZM009616 | Xiannong68            | Shaanxi |
| ZM009825 | Longchun7            | Gansu    | ZM009636 | Shuangfengshou        | Shaanxi |
| ZM009843 | Weidong1             | Gansu    | ZM009637 | Pofengchuan           | Shaanxi |
| ZM009848 | Weidong7             | Gansu    | ZM010319 | Huamai7               | Shaanxi |
| ZM009902 | 5507                 | Gansu    | ZM010327 | Jingzhou1             | Shaanxi |
| ZM009905 | Linnong1             | Gansu    | ZM010332 | Jingzhou66            | Shaanxi |
| ZM009906 | Linnong2             | Gansu    | ZM010565 | Fengmai13             | Shaanxi |
| ZM009907 | Linmai8              | Gansu    | ZM017078 | Xiaoyan5              | Shaanxi |
| ZM009908 | Linnong11            | Gansu    | ZM017092 | Xi'anshixinmai        | Shaanxi |
| ZM009909 | Linnong12            | Gansu    | ZM017116 | Shan62(9)2-1          | Shaanxi |
| ZM009910 | Linnong13            | Gansu    | ZM017117 | Shan62(9)10-4         | Shaanxi |
| ZM009911 | Linnong14            | Gansu    | ZM017138 | Shan5860-19-2-2       | Shaanxi |
| ZM009924 | Linmai4              | Gansu    | ZM017162 | Shan6801-3-1-1        | Shaanxi |
| ZM009926 | Linmai6              | Gansu    | ZM017165 | Shan6815-0-2-3        | Shaanxi |
| ZM009927 | Linmai7              | Gansu    | ZM017180 | Shan7587-1/81         | Shaanxi |
| ZM009977 | Zhongliang11         | Gansu    | ZM017206 | Shannong21-24         | Shaanxi |
| ZM010002 | Xifeng9              | Gansu    | ZM017209 | Xiannong151           | Shaanxi |
| ZM010022 | Qingxuan15           | Gansu    | ZM018254 | Xiaoyan96             | Shaanxi |
| ZM017265 | Gan81(39)-2-7        | Gansu    | ZM018272 | Shan76(15)9-29        | Shaanxi |
| ZM017335 | Linmai26             | Gansu    | ZM018273 | Shan76(73)33-6(white) | Shaanxi |
| ZM018320 | Gan(39)-2            | Gansu    | ZM023497 | Xiaoyan168            | Shaanxi |
| ZM018328 | Gan83(yuan45)-5-4-42 | Gansu    | ZM023568 | Shanxing336           | Shaanxi |

|          |                 |              |          |                           |          |
|----------|-----------------|--------------|----------|---------------------------|----------|
| ZM023599 | Pingliang32     | Gansu        | ZM023572 | Shangluo76(57)22-0-8-7-2  | Shaanxi  |
| MY001212 | Heine Hvede     | Germany      | ZM023574 | Shangluo76(57)22-0-8-7-10 | Shaanxi  |
| ZM016876 | Bimai6(qian)    | Guizhou      | ZM023575 | Shangluo76(57)22-0-8-17   | Shaanxi  |
| ZM016945 | Qianhuan2       | Guizhou      | ZM023577 | Shangluo76(57)22-8-1      | Shaanxi  |
| ZM016946 | Qianhuan3       | Guizhou      | ZM023578 | Shangluo76(57)22-8-7-1-2  | Shaanxi  |
| ZM009099 | Shijiazhuang407 | Hebei        | ZM023580 | Shangluo76(57)22-8-7-1-8  | Shaanxi  |
| ZM009103 | Shijiazhuang34  | Hebei        | ZM024772 | Shanyou225                | Shaanxi  |
| ZM009110 | Xiangyang4      | Hebei        | ZM024776 | Shan8242-1                | Shaanxi  |
| ZM009113 | Shijiazhuang72  | Hebei        | ZM024777 | Shan8242-37               | Shaanxi  |
| ZM009114 | Shipin83        | Hebei        | ZM024903 | Shanmai150                | Shaanxi  |
| ZM009119 | Shi4414         | Hebei        |          | Yuanfeng175               | Shaanxi  |
| ZM009149 | Xingxuan7       | Hebei        | ZM025946 | Xiaoyan54                 | Shaanxi  |
| ZM017723 | Jimai24         | Hebei        |          | Xinong979                 | Shaanxi  |
| ZM021382 | Jimai36         | Hebei        | ZM025942 | Xinong2208                | Shaanxi  |
| ZM024079 | Gaoyou503       | Hebei        | ZM015831 | Lumai2                    | Shandong |
| ZM009678 | Hechun12        | Heilongjiang | ZM009125 | Jimai23                   | Shandong |
| ZM009702 | Kejin6          | Heilongjiang | ZM009392 | Jinan4                    | Shandong |
| ZM009708 | Kehan2          | Heilongjiang | ZM009393 | Jinan5                    | Shandong |
| ZM009719 | Kezhen          | Heilongjiang | ZM009396 | Jinan8                    | Shandong |
| ZM014653 | Ke73-402        | Heilongjiang | ZM009398 | Jinan10                   | Shandong |
| ZM014678 | Kefeng2         | Heilongjiang | ZM009399 | Jinan12                   | Shandong |
| ZM014681 | Kehan9          | Heilongjiang | ZM009410 | Dexuan1                   | Shandong |
| ZM022052 | Long90-05634    | Heilongjiang | ZM009419 | Changle5                  | Shandong |
| ZM022170 | Hei86-30        | Heilongjiang | ZM009422 | Jinjing3                  | Shandong |
| ZM022172 | Hei86-130       | Heilongjiang | ZM009423 | Luzhan1                   | Shandong |
| ZM009463 | Zhengzhou6      | Henan        | ZM015619 | Changwei18                | Shandong |
| ZM009464 | Zhengzhou15     | Henan        | ZM015683 | Jinan14                   | Shandong |
| ZM009465 | Zhengzhou17     | Henan        | ZM015786 | 54405                     | Shandong |
| ZM009466 | Zhengzhou24     | Henan        | ZM022722 | lainong8442               | Shandong |
| ZM009469 | Zhengzhou683    | Henan        | ZM009188 | Taiyuan116                | Shanxi   |
| ZM009470 | Zhengzhou722    | Henan        | ZM009189 | Taiyuan567                | Shanxi   |
| ZM009471 | Zhengzhou742    | Henan        | ZM009263 | Weidong4                  | Shanxi   |
| ZM009473 | Zheng6fu        | Henan        | ZM009267 | Weidong8                  | Shanxi   |
| ZM009488 | Baiquan565      | Henan        | ZM009364 | Hanxuan10                 | Shanxi   |
| ZM009492 | Shicha15        | Henan        | ZM009365 | Hanxuan1                  | Shanxi   |
| ZM009494 | Mengxian2       | Henan        | ZM009382 | Taiyuan566                | Shanxi   |
| ZM009497 | Xuyue6          | Henan        | ZM014430 | Linfen10                  | Shanxi   |
| ZM009502 | Kaifeng10       | Henan        | ZM014210 | Linfen5064                | Shanxi   |
| ZM009506 | Kaizhong70-18   | Henan        | ZM014434 | Jinmai20                  | Shanxi   |
| ZM009508 | Xinzheng1       | Henan        | ZM014435 | Jinmai21                  | Shanxi   |
| ZM009515 | Yanda24         | Henan        | ZM001215 | Shanxipingyaoxiaobaimai   | Shanxi   |
| ZM009516 | Yanda25         | Henan        | ZM010464 | Mianyang4                 | Sichuan  |
| ZM009517 | Yanda26         | Henan        | ZM010467 | Mianyang62-31             | Sichuan  |
| ZM009520 | Suinong3        | Henan        | ZM010473 | Xichang177                | Sichuan  |

|          |                    |       |          |                |          |
|----------|--------------------|-------|----------|----------------|----------|
| ZM009524 | Neixiang19         | Henan | ZM010478 | Xichang662     | Sichuan  |
| ZM009526 | Neixiang173        | Henan | ZM010480 | Youyimai       | Sichuan  |
| ZM009528 | Xinyang12          | Henan | ZM010490 | Shuwan8        | Sichuan  |
| ZM015936 | Huapei64-2         | Henan | ZM010492 | Shuwan24       | Sichuan  |
| ZM015937 | Huapei64-6         | Henan | ZM010516 | Wanya2         | Sichuan  |
| ZM015939 | Huapei83-1         | Henan | ZM016677 | Chuan533       | Sichuan  |
| ZM015942 | Huapei112-2        | Henan | ZM016678 | Chuan578       | Sichuan  |
| ZM015946 | Huapei126          | Henan | ZM016703 | Chuan78001     | Sichuan  |
| ZM015948 | Huapei128          | Henan | ZM016789 | Mianyang12     | Sichuan  |
| ZM015964 | Zheng79201         | Henan | ZM023194 | Chuan80-466    | Sichuan  |
| ZM015987 | Zhengzhou721       | Henan | ZM010588 | Rikaze4        | Xizang   |
| ZM015988 | Zhengzhou741       | Henan | ZM010589 | Rikaze8        | Xizang   |
| ZM015989 | Zhengzhou761       | Henan | ZM010545 | Yunmai25       | Yunnan   |
| ZM015995 | Zhengzhou6811      | Henan | ZM010547 | Yunmai27       | Yunnan   |
| ZM016082 | Yu85-2325          | Henan | ZM010549 | 778            | Yunnan   |
| ZM016116 | Yu30691-1-3        | Henan | ZM010571 | Nanyuan1       | Yunnan   |
| ZM016119 | Yu30691-1-11       | Henan | ZM016966 | Yunmai35       | Yunnan   |
| ZM016120 | Yu30691-3-6(white) | Henan | ZM015195 | Bosul          | Zhejiang |
| ZM016153 | Yu822367           | Henan | ZM022407 | Zhebaoda85pin8 | Zhejiang |

F, founder parents; W, widely-grown cultivar

**TABLE S2** Data acquisition for 8 traits and yield from five locations in 2007, 2008 and 2009.

| Full trait name                   | Abbreviation | 2007 |    |    |    |    | 2008 |    |    |    |    | 2009 |    |    |    |    |
|-----------------------------------|--------------|------|----|----|----|----|------|----|----|----|----|------|----|----|----|----|
|                                   |              | SX   | JS | HB | SD | SC | SX   | JS | HB | SD | SC | SX   | JS | HB | SD | SC |
| Plant height                      | PH           | Y    | Y  | Y  | Y  | Y  | Y    | Y  | Y  | Y  | Y  | Y    | Y  | Y  | Y  | Y  |
| Spike length                      | SL           | Y    | Y  | Y  | Y  | Y  | Y    | Y  | Y  | Y  | Y  | Y    | Y  | Y  | Y  | Y  |
| Total spikelet number per spike   | TSNS         | Y    | Y  | Y  | Y  | -  | Y    | Y  | Y  | Y  | Y  | Y    | Y  | Y  | Y  | Y  |
| Kernel number per spike           | KNS          | Y    | Y  | Y  | Y  | Y  | Y    | Y  | Y  | Y  | Y  | Y    | Y  | Y  | Y  | Y  |
| Thousand kernel weight            | TKW          | Y    | Y  | Y  | Y  | Y  | Y    | Y  | Y  | Y  | Y  | Y    | Y  | Y  | Y  | Y  |
| Spike number per plant            | SNPP         | Y    | Y  | Y  | Y  | -  | Y    | Y  | Y  | Y  | -  | Y    | Y  | Y  | Y  | -  |
| Fertile spikelet number per spike | FSNS         | -    | Y  | Y  | Y  | -  | -    | Y  | Y  | -  | Y  | -    | Y  | Y  | Y  | Y  |
| Grain weight per spike            | GWS          | Y    | Y  | Y  | Y  | Y  | Y    | Y  | Y  | Y  | Y  | Y    | Y  | Y  | Y  | Y  |
| Yield                             | YD           | Y    |    |    |    |    | Y    | Y  | Y  | Y  | Y  | Y    | Y  | Y  | Y  | Y  |

SX, HB, SD, SC and JS refer to Shaanxi, Hebei, Shandong, Sichuan and Jiangsu locations, respectively. '-', indicated that data were missing

**TABLE S3** Descriptive statistics of phenotypic variations in 8 traits and yield.

| Year | Location | Item   | PH     | SL    | TSNS  | KNS   | TKW   | SNPP  | FSNS  | YD      | GWS  |
|------|----------|--------|--------|-------|-------|-------|-------|-------|-------|---------|------|
| 2007 | Shaanxi  | Mean   | 102.77 | 9.14  | 19.11 | 51.84 | 38.09 | 13.32 | -     | 798.05  | 1.97 |
|      |          | Max    | 148.20 | 16.70 | 26.60 | 82.20 | 57.80 | 23.90 | -     | 1226.50 | 3.07 |
|      |          | Min    | 52.30  | 5.70  | 15.00 | 35.50 | 23.70 | 6.90  | -     | 270.00  | 1.20 |
|      |          | Stdev  | 19.72  | 1.54  | 1.56  | 6.94  | 4.83  | 2.77  | -     | 164.05  | 0.33 |
|      |          | CV     | 0.19   | 0.17  | 0.08  | 0.13  | 0.13  | 0.21  | -     | 0.21    | 0.17 |
|      | Yangzhou | Mean   | 106.98 | 9.96  | 21.97 | 51.99 | 39.33 | 11.14 | 20.30 | -       | 2.28 |
|      | Max      | 155.80 | 18.74  | 30.43 | 80.05 | 57.10 | 19.88 | 27.77 | -     | 3.93    |      |

|      |          |       |        |       |       |       |       |       |       |         |      |
|------|----------|-------|--------|-------|-------|-------|-------|-------|-------|---------|------|
|      |          | Min   | 57.55  | 7.01  | 18.30 | 31.70 | 23.05 | 4.63  | 16.60 | -       | 0.66 |
|      |          | Stdev | 17.57  | 1.39  | 1.69  | 8.57  | 5.88  | 2.25  | 1.57  | -       | 0.49 |
|      |          | CV    | 0.16   | 0.14  | 0.08  | 0.16  | 0.15  | 0.20  | 0.08  | -       | 0.22 |
|      | Hebei    | Mean  | 98.27  | 9.45  | 20.78 | 56.98 | 40.18 | 10.14 | 19.48 | -       | 2.28 |
|      |          | Max   | 147.00 | 21.00 | 29.00 | 94.50 | 63.72 | 21.50 | 27.00 | -       | 4.50 |
|      |          | Min   | 50.00  | 5.20  | 16.00 | 31.50 | 23.12 | 3.50  | 15.00 | -       | 1.01 |
|      |          | Stdev | 19.83  | 1.75  | 1.89  | 11.22 | 5.71  | 2.99  | 1.92  | -       | 0.52 |
|      |          | CV    | 0.20   | 0.18  | 0.09  | 0.20  | 0.14  | 0.30  | 0.10  | -       | 0.23 |
|      | Shandong | Mean  | 96.95  | 10.04 | 18.78 | 48.02 | 35.90 | 15.72 | 17.31 | -       | 1.72 |
|      |          | Max   | 132.13 | 15.80 | 25.33 | 77.80 | 54.20 | 39.53 | 22.37 | -       | 2.90 |
|      |          | Min   | 48.20  | 6.40  | 12.63 | 24.85 | 19.80 | 3.50  | 9.57  | -       | 0.68 |
|      |          | Stdev | 16.22  | 1.50  | 1.66  | 8.21  | 5.67  | 4.78  | 1.85  | -       | 0.39 |
|      |          | CV    | 0.17   | 0.15  | 0.09  | 0.17  | 0.16  | 0.30  | 0.11  | -       | 0.23 |
|      | Sichuan  | Mean  | 112.97 | 8.72  | -     | 46.28 | 39.02 | -     | -     | -       | 1.81 |
|      |          | Max   | 155.00 | 16.00 | -     | 92.00 | 59.00 | -     | -     | -       | 4.03 |
|      |          | Min   | 55.00  | 5.00  | -     | 14.00 | 15.00 | -     | -     | -       | 0.43 |
|      |          | Stdev | 18.61  | 1.51  | -     | 13.32 | 6.93  | -     | -     | -       | 0.62 |
|      |          | CV    | 0.16   | 0.17  | -     | 0.29  | 0.18  | -     | -     | -       | 0.34 |
| 2008 | Shaanxi  | Mean  | 99.59  | 8.68  | 19.76 | 51.45 | 42.05 | 6.03  | -     | 1345.66 | 2.16 |
|      |          | Max   | 146.30 | 16.00 | 25.77 | 81.47 | 62.97 | 11.83 | -     | 1970.73 | 3.22 |
|      |          | Min   | 51.14  | 4.92  | 14.37 | 35.13 | 26.37 | 3.37  | -     | 733.43  | 1.22 |
|      |          | Stdev | 17.42  | 1.42  | 1.72  | 6.38  | 5.00  | 1.20  | -     | 175.19  | 0.33 |
|      |          | CV    | 0.17   | 0.16  | 0.09  | 0.12  | 0.12  | 0.20  | -     | 0.13    | 0.15 |
|      | Yangzhou | Mean  | 104.75 | 10.03 | 21.17 | 51.67 | 37.37 | 10.05 | 19.64 | -       | 2.29 |
|      |          | Max   | 145.29 | 17.96 | 27.77 | 77.97 | 56.97 | 15.77 | 25.90 | -       | 3.83 |
|      |          | Min   | 55.83  | 6.34  | 16.90 | 29.10 | 19.03 | 5.53  | 16.00 | -       | 0.90 |
|      |          | Stdev | 14.94  | 1.51  | 1.56  | 7.76  | 5.88  | 1.72  | 1.39  | -       | 0.45 |
|      |          | CV    | 0.14   | 0.15  | 0.07  | 0.15  | 0.16  | 0.17  | 0.07  | -       | 0.20 |
|      | Hebei    | Mean  | 90.12  | 9.18  | 19.49 | 50.46 | 37.40 | 7.38  | 18.70 | 1012.12 | 1.88 |
|      |          | Max   | 148.50 | 20.85 | 26.67 | 80.78 | 64.04 | 19.30 | 24.34 | 1554.77 | 3.12 |
|      |          | Min   | 45.77  | 5.70  | 13.33 | 27.56 | 21.69 | 3.97  | 10.34 | 113.93  | 0.69 |
|      |          | Stdev | 17.83  | 1.93  | 1.98  | 9.26  | 5.49  | 1.99  | 1.92  | 245.85  | 0.40 |
|      |          | CV    | 0.20   | 0.21  | 0.10  | 0.18  | 0.15  | 0.27  | 0.10  | 0.24    | 0.21 |
|      | Shandong | Mean  | 98.56  | 9.49  | 18.49 | 41.02 | 37.56 | 6.50  | -     | 1340.89 | 1.54 |
|      |          | Max   | 131.53 | 13.50 | 21.70 | 54.87 | 53.50 | 10.47 | -     | 2000.00 | 2.42 |
|      |          | Min   | 56.70  | 7.07  | 15.87 | 28.60 | 21.57 | 4.30  | -     | 543.33  | 0.92 |
|      |          | Stdev | 16.65  | 0.95  | 1.07  | 5.04  | 6.54  | 1.00  | -     | 289.04  | 0.34 |
|      |          | CV    | 0.17   | 0.10  | 0.06  | 0.12  | 0.17  | 0.15  | -     | 0.22    | 0.22 |
|      | Sichuan  | Mean  | 101.55 | 7.86  | 20.64 | 33.15 | 39.98 | -     | 16.82 | 575.80  | 1.33 |
|      |          | Max   | 146.08 | 14.57 | 26.23 | 67.49 | 62.10 | -     | 21.93 | 933.33  | 2.60 |
|      |          | Min   | 51.62  | 5.22  | 16.55 | 15.58 | 26.33 | -     | 13.00 | 213.33  | 0.57 |
|      |          | Stdev | 17.46  | 1.17  | 1.55  | 6.41  | 5.12  | -     | 1.40  | 128.50  | 0.30 |
|      |          | CV    | 0.17   | 0.15  | 0.08  | 0.19  | 0.13  | -     | 0.08  | 0.22    | 0.23 |
| 2009 | Shaanxi  | Mean  | 93.81  | 9.13  | 15.71 | 51.38 | 38.68 | 7.22  | -     | 1097.90 | 1.98 |

|              |       |        |       |       |       |       |       |       |         |      |
|--------------|-------|--------|-------|-------|-------|-------|-------|-------|---------|------|
|              | Max   | 139.34 | 16.37 | 23.30 | 79.40 | 53.90 | 12.50 | -     | 1642.30 | 3.18 |
|              | Min   | 50.27  | 5.38  | 7.40  | 31.60 | 25.90 | 4.00  | -     | 568.50  | 1.15 |
|              | Stdev | 13.85  | 1.73  | 2.56  | 7.39  | 4.59  | 1.46  | -     | 210.78  | 0.36 |
|              | CV    | 0.15   | 0.19  | 0.16  | 0.14  | 0.12  | 0.20  | -     | 0.19    | 0.18 |
| Yangzhou     | Mean  | 106.95 | 9.99  | 21.03 | 50.72 | 36.52 | 5.06  | 19.29 | -       | 1.85 |
|              | Max   | 157.33 | 17.07 | 29.00 | 81.43 | 55.10 | 8.27  | 28.57 | -       | 3.20 |
|              | Min   | 64.97  | 6.49  | 17.80 | 28.40 | 21.83 | 1.95  | 16.10 | -       | 0.97 |
|              | Stdev | 16.66  | 1.48  | 1.43  | 8.98  | 4.97  | 0.95  | 1.28  | -       | 0.42 |
|              | CV    | 0.16   | 0.15  | 0.07  | 0.18  | 0.14  | 0.19  | 0.07  | -       | 0.23 |
| Hebei        | Mean  | 89.81  | 9.09  | 19.42 | 53.14 | 35.56 | 11.63 | 18.70 | 1433.93 | 1.88 |
|              | Max   | 130.87 | 19.07 | 25.96 | 88.00 | 52.08 | 28.29 | 24.36 | 2025.82 | 3.46 |
|              | Min   | 48.38  | 5.25  | 16.14 | 32.61 | 21.20 | 5.63  | 15.17 | 610.03  | 1.07 |
|              | Stdev | 15.82  | 1.64  | 1.51  | 8.92  | 4.59  | 3.39  | 1.50  | 221.73  | 0.35 |
|              | CV    | 0.18   | 0.18  | 0.08  | 0.17  | 0.13  | 0.29  | 0.08  | 0.15    | 0.18 |
| Shandong     | Mean  | 103.34 | 8.84  | 19.10 | 42.37 | 39.70 | 7.15  | 17.07 | 1356.81 | 1.68 |
|              | Max   | 145.37 | 18.57 | 25.33 | 61.10 | 56.23 | 12.07 | 22.57 | 1803.33 | 2.64 |
|              | Min   | 51.73  | 5.93  | 14.43 | 28.40 | 23.70 | 4.20  | 12.33 | 790.00  | 1.01 |
|              | Stdev | 20.31  | 1.33  | 1.41  | 5.83  | 4.98  | 1.51  | 1.43  | 184.92  | 0.29 |
|              | CV    | 0.20   | 0.15  | 0.07  | 0.14  | 0.13  | 0.21  | 0.08  | 0.14    | 0.17 |
| Sichuan      | Mean  | 106.40 | 8.38  | 21.15 | 34.80 | 38.94 | -     | 16.91 | 653.02  | 1.35 |
|              | Max   | 173.72 | 12.36 | 28.33 | 61.14 | 76.52 | -     | 22.56 | 987.28  | 3.32 |
|              | Min   | 52.31  | 5.83  | 12.74 | 13.18 | 13.53 | -     | 8.95  | 160.51  | 0.28 |
|              | Stdev | 19.35  | 0.95  | 1.61  | 7.44  | 7.89  | -     | 1.67  | 144.46  | 0.36 |
|              | CV    | 0.18   | 0.11  | 0.08  | 0.21  | 0.20  | -     | 0.10  | 0.22    | 0.26 |
| Heritability |       | 0.98   | 0.94  | 0.91  | 0.84  | 0.94  | 0.85  | 0.85  | 0.77    | 0.91 |

SL, spike length; TKW, 1000-kernel weight; KNS, kernel number per spike; TSNS, total spikelet number per spike; FSNS, fertile spikelet number per spike; GWS, grain weight per spike; PH, plant height; SNPP, spike number per plant; YD, yield

**TABLE S4** Correlation coefficients of the 8 agronomic traits and yield among the 384 accessions.

|      | FSNS     | TKW      | KNS      | GWS      | SL       | YD       | TSNS     | SNPP     | PH       |
|------|----------|----------|----------|----------|----------|----------|----------|----------|----------|
| FSNS | 1        | -0.307** | 0.582**  | 0.220**  | 0.361**  | -0.099   | 0.919**  | -0.249** | 0.056    |
| TKW  | -0.307** | 1        | -0.127*  | 0.641**  | -0.066   | 0.555**  | -0.339** | -0.390** | -0.326** |
| KNS  | 0.582**  | -0.127*  | 1        | 0.670**  | 0.288**  | 0.206**  | 0.478**  | -0.589** | -0.242** |
| GWS  | 0.220**  | 0.641**  | 0.670**  | 1        | 0.178**  | 0.556**  | 0.119*   | -0.738** | -0.389** |
| SL   | 0.361**  | -0.066   | 0.288**  | 0.178**  | 1        | -0.264** | 0.444**  | -0.221** | 0.308**  |
| YD   | -0.099   | 0.555**  | 0.206**  | 0.556**  | -0.264** | 1        | -0.172** | -0.241** | -0.612** |
| TSNS | 0.919**  | -0.339** | 0.478**  | 0.119*   | 0.444**  | -0.172** | 1        | -0.147** | 0.138**  |
| SNPP | -0.249** | -0.390** | -0.589** | -0.738** | -0.221** | -0.241** | -0.147** | 1        | 0.323**  |
| PH   | 0.056    | -0.326** | -0.242** | -0.389** | 0.308**  | -0.612** | 0.138**  | 0.323**  | 1        |

\* and \*\* significant at the 0.05 and 0.01 levels, respectively. SL, spike length; TKW, 1000-kernel weight; KNS, kernel number per spike; TSNS, total spikelet number per spike; FSNS, fertile spikelet number per spike; GWS, grain weight per spike; PH, plant height; SNPP, spike number per plant; YD, yield

**TABLE S5** Information for significant SNPs associated with 8 agronomic traits using phenotypic data in individual environments and BLUP value across all environments.

| Trait        | Marker       | Chr          | Pos       | Average of P | Average of R <sup>2</sup> | Average of q | Environment            |
|--------------|--------------|--------------|-----------|--------------|---------------------------|--------------|------------------------|
| TKW          | AX-111525866 | 1D           | 263206152 | 1.15918E-05  | 0.0617                    | 0.0974       | 09JS                   |
|              | AX-108891065 | 2A           | 247644605 | 1.49205E-06  | 0.0728                    | 0.0250       | 08SX                   |
|              | AX-112288215 | 3D           | 546698610 | 1.56265E-06  | 0.0742                    | 0.0374       | 07HB                   |
|              | AX-111600193 | 4A           | 642368219 | 4.14082E-06  | 0.0762                    | 0.1058       | 08SX, 09SX             |
|              | AX-111206016 | 4D           | 101658416 | 7.10291E-06  | 0.0651                    | 0.1449       | 08SX, 09SX             |
|              | AX-109860828 | 5B           | 422030835 | 9.9646E-06   | 0.0623                    | 0.1496       | 09JS, 08SC             |
|              | AX-86180093  | 5D           | 560329049 | 2.58749E-06  | 0.0732                    | 0.0442       | 08SX, 07SX, 09JS       |
|              | AX-111554374 | 6A           | 84033013  | 2.8188E-06   | 0.0698                    | 0.0519       | 09JS                   |
|              | AX-109994561 | 7A           | 485512306 | 1.31821E-05  | 0.0610                    | 0.0950       | 08SX                   |
|              | AX-109429982 | 7B           | 660663186 | 3.09219E-06  | 0.0697                    | 0.0519       | 09JS                   |
|              | AX-86172687  | 7D           | 23495477  | 2.60768E-06  | 0.0721                    | 0.0566       | BLUP, 09JS, 07SX, 08SX |
|              | AX-110584778 | 7D           | 195624197 | 3.71223E-07  | 0.0827                    | 0.0187       | 07HB                   |
|              | AX-108838800 | 7D           | 524655072 | 3.56577E-06  | 0.0686                    | 0.0735       | BLUP, 08SX             |
|              | KNS          | AX-111101445 | 1A        | 152814564    | 2.98904E-06               | 0.0718       | 0.0856                 |
| AX-110909230 |              | 1A           | 552153001 | 5.74156E-06  | 0.0664                    | 0.0289       | 08SC                   |
| AX-111452123 |              | 1B           | 570572742 | 2.37367E-06  | 0.0714                    | 0.0371       | 07SD                   |
| AX-110941446 |              | 1B           | 648034988 | 1.96091E-05  | 0.0596                    | 0.0554       | 08SC                   |
| AX-94959165  |              | 1D           | 273817873 | 4.31443E-06  | 0.0675                    | 0.0241       | 08SC                   |
| AX-94991487  |              | 1D           | 492609848 | 6.14953E-06  | 0.0678                    | 0.1549       | 07JS                   |
| AX-111238502 |              | 2A           | 217341921 | 1.27733E-05  | 0.0641                    | 0.0810       | 07SD                   |
| AX-110927323 |              | 2A           | 269062196 | 3.41077E-06  | 0.0679                    | 0.0215       | 08SC                   |
| AX-108917295 |              | 2B           | 296475460 | 1.44255E-05  | 0.0601                    | 0.0510       | 08SC                   |
| AX-109924857 |              | 2B           | 766025783 | 3.6775E-06   | 0.0689                    | 0.0371       | 07SD                   |
| AX-109361764 |              | 2D           | 31605959  | 9.34079E-07  | 0.0778                    | 0.0094       | 08SC                   |
| AX-109838059 |              | 2D           | 64156091  | 3.01082E-06  | 0.0696                    | 0.0371       | 07SD                   |
| AX-110982403 |              | 2D           | 525904353 | 4.57252E-06  | 0.0793                    | 0.1018       | 08SC, 08SX             |
| AX-108785278 |              | 2D           | 612329631 | 1.25507E-06  | 0.0741                    | 0.0106       | 08SC                   |
| AX-109957323 |              | 3A           | 744605488 | 1.93555E-07  | 0.0736                    | 0.0098       | 07SD                   |
| AX-108848855 |              | 3B           | 598123231 | 1.96713E-05  | 0.0492                    | 0.0810       | 07SD                   |
| AX-108776339 |              | 3B           | 709412018 | 4.70747E-06  | 0.0680                    | 0.0395       | 07SD                   |
| AX-110529591 |              | 4B           | 1110449   | 1.2908E-05   | 0.0627                    | 0.0810       | 07SD                   |
| AX-108931449 |              | 5A           | 462891588 | 6.1513E-06   | 0.0658                    | 0.1549       | 07JS                   |
| AX-108933860 |              | 5A           | 688441967 | 1.61601E-05  | 0.0600                    | 0.0510       | 08SC                   |
| AX-111596404 |              | 5D           | 558824993 | 1.47542E-05  | 0.0614                    | 0.0810       | 07SD                   |
| AX-109821048 |              | 6A           | 72428295  | 1.57132E-05  | 0.0610                    | 0.0510       | 08SC                   |
| AX-111554374 |              | 6A           | 84033013  | 3.40309E-06  | 0.0692                    | 0.0856       | 09HB                   |
| AX-111044766 |              | 6A           | 558978118 | 3.42339E-06  | 0.0712                    | 0.1723       | 07SX                   |
| AX-111006947 |              | 6A           | 609816201 | 1.55063E-06  | 0.0733                    | 0.0371       | 07SD                   |
| AX-109521536 |              | 6B           | 213489924 | 4.8716E-08   | 0.0940                    | 0.0008       | 08SC                   |
| AX-109307185 |              | 6B           | 404362390 | 8.83087E-07  | 0.0771                    | 0.0445       | 08SX                   |
| AX-109348334 |              | 6B           | 448463951 | 1.8484E-05   | 0.0498                    | 0.0810       | 07SD                   |



|    |              |    |           |             |        |        |                                                                              |
|----|--------------|----|-----------|-------------|--------|--------|------------------------------------------------------------------------------|
|    | AX-110536570 | 6B | 457424533 | 1.19447E-05 | 0.0634 | 0.0461 | 08SC                                                                         |
|    | AX-110024963 | 6B | 656594585 | 1.30134E-07 | 0.0874 | 0.0016 | 08SC                                                                         |
|    | AX-109308195 | 7A | 92790790  | 1.05959E-05 | 0.0656 | 0.0445 | 08SC                                                                         |
|    | AX-110586229 | 7A | 272925912 | 7.40197E-06 | 0.0641 | 0.0339 | 08SC                                                                         |
|    | AX-108902552 | 7D | 241175886 | 2.90755E-06 | 0.0695 | 0.0209 | 08SC                                                                         |
|    | AX-94393306  | 7D | 571861892 | 4.5355E-08  | 0.0945 | 0.0008 | 08SC                                                                         |
| SL | AX-111619451 | 1A | 180422966 | 1.2148E-05  | 0.0634 | 0.0762 | 09SD                                                                         |
|    | AX-109312262 | 1A | 369324860 | 1.06284E-05 | 0.0626 | 0.0356 | 08JS                                                                         |
|    | AX-110979338 | 1A | 477467390 | 4.3058E-09  | 0.1109 | 0.0000 | 07SC                                                                         |
|    | AX-111166388 | 1A | 535329857 | 1.65451E-05 | 0.0517 | 0.0193 | 07SC                                                                         |
|    | AX-108935155 | 1A | 549673017 | 1.18266E-07 | 0.0906 | 0.0048 | 07SX                                                                         |
|    | AX-109329289 | 1B | 90544523  | 1.57452E-05 | 0.0601 | 0.0989 | 08SC                                                                         |
|    | AX-109330481 | 1B | 389794980 | 9.05827E-06 | 0.0639 | 0.0761 | 09JS                                                                         |
|    | AX-109980222 | 1B | 410320741 | 9.26371E-06 | 0.0653 | 0.0120 | 07SC                                                                         |
|    | AX-109966524 | 1B | 512107124 | 1.66803E-05 | 0.0609 | 0.0336 | 08SD                                                                         |
|    | AX-109901032 | 1B | 566185090 | 3.16441E-06 | 0.0699 | 0.0281 | 07SD                                                                         |
|    | AX-110627624 | 1D | 40001986  | 2.14254E-07 | 0.0867 | 0.0005 | 07SC                                                                         |
|    | AX-110885924 | 1D | 253988110 | 4.55199E-06 | 0.0741 | 0.0311 | 08SD, 07HB, 08JS, 08SX, 07SX                                                 |
|    | AX-111525866 | 1D | 263206152 | 1.22333E-06 | 0.0820 | 0.0055 | 07SC, 09SC                                                                   |
|    | AX-111946510 | 1D | 478865288 | 4.13359E-07 | 0.0838 | 0.0009 | 07SC                                                                         |
|    | AX-111584834 | 1D | 482206429 | 6.05225E-06 | 0.0944 | 0.0119 | 07SC, 09SC, 08SD                                                             |
|    | AX-109878026 | 2A | 68718264  | 1.13144E-05 | 0.0648 | 0.0270 | 07HB, 08SD, 07SD                                                             |
|    | AX-108880421 | 2A | 103141017 | 1.63523E-05 | 0.0605 | 0.0476 | 08HB                                                                         |
|    | AX-108891065 | 2A | 247644605 | 4.62313E-06 | 0.0922 | 0.0299 | 07SC, 08SX, 08SC, 07JS, 08JS, 07SD,<br>07HB, 07SX, 09SC, 09JS, 09SD,<br>09HB |
|    | AX-110930369 | 2B | 533507696 | 6.17462E-06 | 0.0675 | 0.0148 | 07HB                                                                         |
|    | AX-108833859 | 2B | 563059129 | 6.17012E-06 | 0.0694 | 0.0221 | 07HB, 08SD, 07SD, 08JS                                                       |
|    | AX-109974803 | 2B | 646893657 | 1.12724E-05 | 0.0624 | 0.0356 | 08JS                                                                         |
|    | AX-110412442 | 2B | 651722410 | 5.23449E-06 | 0.0868 | 0.0185 | 07SC, 08JS, 07JS, 08SC, 08SX, 09SC                                           |
|    | AX-111064656 | 2B | 652657237 | 6.44231E-06 | 0.0705 | 0.0181 | 07HB, 08SD, 08JS                                                             |
|    | AX-108838533 | 2D | 20349414  | 1.09476E-07 | 0.0907 | 0.0003 | 07SC                                                                         |
|    | AX-111772631 | 2D | 20982836  | 1.13553E-06 | 0.0818 | 0.0055 | 07SC, 09SC                                                                   |
|    | AX-109546505 | 2D | 85825611  | 3.76226E-07 | 0.0706 | 0.0063 | 08HB                                                                         |
|    | AX-109508682 | 2D | 247376233 | 9.77949E-06 | 0.0545 | 0.0123 | 07SC                                                                         |
|    | AX-109823219 | 2D | 325031531 | 1.29046E-05 | 0.0615 | 0.0450 | 09SC                                                                         |
|    | AX-111633510 | 3A | 21360215  | 8.55252E-06 | 0.0657 | 0.0341 | 07SD                                                                         |
|    | AX-111039910 | 3A | 23455186  | 1.28163E-07 | 0.0921 | 0.0003 | 07SC                                                                         |
|    | AX-109345729 | 3A | 483161117 | 3.65507E-06 | 0.0693 | 0.0331 | 07SC, 09SD                                                                   |
|    | AX-111507661 | 3A | 535929426 | 1.36621E-05 | 0.0632 | 0.0476 | 08HB                                                                         |
|    | AX-111811874 | 3A | 568838239 | 1.7487E-05  | 0.0499 | 0.0979 | 09JS                                                                         |
|    | AX-110669775 | 3A | 667086002 | 4.06617E-06 | 0.0772 | 0.0320 | 07HB, 08SD, 08JS, 08SX, 07SD, 09HB,<br>08HB, 07SX                            |
|    | AX-109842977 | 3B | 139033860 | 7.99599E-06 | 0.0659 | 0.0239 | 07HB, 08SD, 07SD, 08JS                                                       |

|              |    |           |             |        |        |                                                                  |
|--------------|----|-----------|-------------|--------|--------|------------------------------------------------------------------|
| AX-110563644 | 3B | 400572493 | 8.66489E-06 | 0.0672 | 0.0118 | 07SC                                                             |
| AX-110035956 | 3B | 755605526 | 1.83266E-05 | 0.0605 | 0.0341 | 08SD                                                             |
| AX-94469025  | 3D | 22680050  | 1.34284E-05 | 0.0616 | 0.0844 | 09JS                                                             |
| AX-110021640 | 3D | 555205315 | 9.16985E-06 | 0.0658 | 0.0283 | 07SD, 07HB                                                       |
| AX-110405004 | 3D | 603459394 | 1.56425E-05 | 0.0601 | 0.0291 | 07HB                                                             |
| AX-95164655  | 3D | 604303999 | 6.98874E-06 | 0.0645 | 0.0762 | 09SD                                                             |
| AX-108838761 | 4A | 110334872 | 4.11242E-06 | 0.0713 | 0.0199 | 07HB, 08SD, 07SD, 08JS, 08JS                                     |
| AX-109272207 | 4A | 133050366 | 1.16446E-05 | 0.0535 | 0.0139 | 07SC                                                             |
| AX-110432225 | 4A | 239579500 | 1.25199E-06 | 0.0773 | 0.0025 | 07SC                                                             |
| AX-109531016 | 4A | 575803804 | 7.94942E-06 | 0.0658 | 0.0245 | 07HB, 08SD, 08JS, 07SD                                           |
| AX-109841603 | 4A | 615169027 | 4.76268E-06 | 0.0723 | 0.0095 | 08SX, 07SC                                                       |
| AX-111600193 | 4A | 642368219 | 2.22638E-06 | 0.0998 | 0.0180 | 07SC, 09SC, 08SX, 08SC, 07JS, 08SD, 09JS, 08JS, 07SX, 09SD       |
| AX-110024812 | 4B | 14081501  | 8.92873E-06 | 0.0663 | 0.0320 | 08SD, 07SD, 08SX                                                 |
| AX-111167883 | 4B | 406809257 | 1.05331E-05 | 0.0643 | 0.0231 | 07HB, 08SD                                                       |
| AX-110384011 | 4B | 496553658 | 5.77775E-06 | 0.0675 | 0.0094 | 07SC                                                             |
| AX-108935259 | 4B | 664244353 | 1.049E-05   | 0.0636 | 0.0341 | 07SD                                                             |
| AX-109986929 | 4D | 138       | 8.47805E-06 | 0.0670 | 0.0118 | 07SC                                                             |
| AX-110430981 | 4D | 375       | 6.83895E-06 | 0.0648 | 0.0431 | 08HB                                                             |
| AX-111157475 | 4D | 455171149 | 5.17409E-06 | 0.0688 | 0.0195 | 08SD, 07HB, 08SX, 08JS                                           |
| AX-109997529 | 5A | 49435160  | 1.83652E-05 | 0.0598 | 0.0331 | 07HB                                                             |
| AX-108754211 | 5A | 100710754 | 1.69816E-05 | 0.0669 | 0.0476 | 08HB                                                             |
| AX-108844453 | 5A | 453892447 | 7.6903E-06  | 0.0660 | 0.0117 | 07SC                                                             |
| AX-109897379 | 5A | 454825148 | 2.17617E-07 | 0.0868 | 0.0005 | 07SC                                                             |
| AX-109888319 | 5B | 48565175  | 5.74386E-06 | 0.0636 | 0.0272 | 07HB, 08SD, 08JS, 09HB                                           |
| AX-111043300 | 5B | 296585755 | 7.14281E-09 | 0.1074 | 0.0000 | 07SC                                                             |
| AX-108956865 | 5B | 301057494 | 8.16185E-06 | 0.0696 | 0.0249 | 07HB, 08SD, 07SD, 08JS                                           |
| AX-110438555 | 5B | 359132576 | 1.60378E-05 | 0.0618 | 0.0476 | 08HB                                                             |
| AX-109271155 | 5B | 407044533 | 5.8254E-06  | 0.0658 | 0.0225 | 07HB, 07SD                                                       |
| AX-110712791 | 5B | 653426784 | 3.45587E-06 | 0.0691 | 0.0581 | 09SD                                                             |
| AX-95152512  | 5D | 14390791  | 4.56013E-09 | 0.1371 | 0.0002 | 07SC, 09SC, 07JS                                                 |
| AX-94398741  | 5D | 462027776 | 8.27845E-06 | 0.0679 | 0.0229 | 07HB, 07SD                                                       |
| AX-109809706 | 5D | 476819411 | 5.91153E-06 | 0.0678 | 0.0115 | 09SC, 07SC                                                       |
| AX-110639062 | 5D | 495061297 | 5.90573E-07 | 0.0797 | 0.0298 | 09HB                                                             |
| AX-108898503 | 5D | 554823716 | 1.78288E-06 | 0.0761 | 0.0116 | 07SC, 08SC, 09SC                                                 |
| AX-86180093  | 5D | 560329049 | 2.82212E-06 | 0.1056 | 0.0186 | 07SC, 09SC, 08SX, 08SC, 07JS, 09JS, 07SX, 08JS, 08SD, 09HB, 09SD |
| AX-110932218 | 6A | 1648056   | 2.74623E-06 | 0.0783 | 0.0252 | 07HB, 08JS, 09HB                                                 |
| AX-110946238 | 6A | 18461050  | 1.59015E-05 | 0.0600 | 0.0476 | 08HB                                                             |
| AX-110993884 | 6A | 557559454 | 8.27939E-06 | 0.0674 | 0.0284 | 07HB, 08SD, 07SD, 08HB                                           |
| AX-89610547  | 6A | 564585216 | 1.3807E-06  | 0.0751 | 0.0232 | 07SD                                                             |
| AX-111686735 | 6B | 144960242 | 2.97934E-08 | 0.1009 | 0.0001 | 07SC                                                             |
| AX-109317829 | 6B | 236329093 | 8.06447E-06 | 0.0656 | 0.0118 | 07SC                                                             |
| AX-109084084 | 6B | 567656373 | 3.3166E-06  | 0.0968 | 0.0260 | 07SC, 09SC, 08SX, 08SC, 08SD,                                    |

|     |              |    |           |             |        |        |                                                                                                      |
|-----|--------------|----|-----------|-------------|--------|--------|------------------------------------------------------------------------------------------------------|
|     |              |    |           |             |        |        | 07SX, 09JS, 07JS                                                                                     |
|     | AX-108758805 | 6B | 643139473 | 4.79687E-06 | 0.0690 | 0.0176 | 07HB, 08SD, 08JS                                                                                     |
|     | AX-111156621 | 6D | 6011401   | 8.19255E-06 | 0.0669 | 0.0251 | 07HB, 08SD, 08JS, 08HB                                                                               |
|     | AX-110023271 | 7A | 114087145 | 3.85463E-09 | 0.1107 | 0.0000 | 07SC                                                                                                 |
|     | AX-110380064 | 7A | 136452857 | 2.8078E-06  | 0.0791 | 0.0115 | 08SD, 07HB, 08JS, 08SX, 07SD                                                                         |
|     | AX-89480189  | 7A | 145491195 | 4.00924E-06 | 0.0675 | 0.0337 | 08HB                                                                                                 |
|     | AX-108810662 | 7A | 493239957 | 5.21486E-06 | 0.0680 | 0.0191 | 08SD                                                                                                 |
|     | AX-108882731 | 7A | 154593622 | 6.65043E-06 | 0.0657 | 0.0206 | 08SD                                                                                                 |
|     | AX-111576358 | 7A | 485200708 | 1.69438E-05 | 0.0608 | 0.0365 | 07HB, 07SD                                                                                           |
|     | AX-109336938 | 7B | 8939649   | 3.39865E-06 | 0.0695 | 0.0428 | 09JS                                                                                                 |
|     | AX-94592534  | 7B | 496271774 | 4.7049E-06  | 0.0688 | 0.0081 | 07SC                                                                                                 |
|     | AX-111568844 | 7B | 505447589 | 2.02908E-06 | 0.0736 | 0.0038 | 07SC                                                                                                 |
|     | AX-110366783 | 7B | 711490256 | 1.32446E-05 | 0.0614 | 0.0376 | 08JS                                                                                                 |
|     | AX-108911221 | 7D | 4991311   | 4.94439E-08 | 0.0849 | 0.0002 | 07SC                                                                                                 |
|     | AX-111034889 | 7D | 22777210  | 1.39352E-05 | 0.0608 | 0.0476 | 08HB                                                                                                 |
|     | AX-110503493 | 7D | 40499462  | 1.0077E-05  | 0.0646 | 0.0124 | 07SC                                                                                                 |
|     | AX-109872520 | 7D | 97305325  | 3.67878E-06 | 0.0688 | 0.0098 | 07HB                                                                                                 |
|     | AX-110907225 | 7D | 112241770 | 5.89214E-06 | 0.0682 | 0.0197 | 07HB, 08SD, 07SD                                                                                     |
|     | AX-109847755 | 7D | 145671513 | 7.202E-06   | 0.0682 | 0.0222 | 07HB, 08SD, 07SD                                                                                     |
|     | AX-109519401 | 7D | 197304632 | 2.87892E-07 | 0.0718 | 0.0063 | 08HB                                                                                                 |
|     | AX-110804188 | 7D | 373567260 | 6.21231E-06 | 0.0682 | 0.0098 | 07SC                                                                                                 |
|     | AX-111503444 | 7D | 393285287 | 5.31997E-06 | 0.0786 | 0.0184 | 07SC, 08SX, 09SC                                                                                     |
|     | AX-94712769  | 7D | 393576415 | 7.92873E-06 | 0.0641 | 0.0762 | 09SD                                                                                                 |
|     | AX-108921665 | 7D | 436396665 | 1.66226E-06 | 0.0725 | 0.0167 | 08HB                                                                                                 |
|     | AX-109095425 | 7D | 520184143 | 1.22019E-06 | 0.0639 | 0.0154 | 08HB                                                                                                 |
|     | AX-108838800 | 7D | 524655072 | 3.01132E-07 | 0.0874 | 0.0034 | 07SC, 08SX, 09JS, 08HB, 09SC, 08JS,<br>07JS, 08SC, 09SD                                              |
|     | AX-110349900 | 7D | 528073469 | 9.24267E-06 | 0.0664 | 0.0265 | 07SC, 09SC                                                                                           |
|     | AX-110362518 | 7D | 529688251 | 1.80695E-05 | 0.0512 | 0.0207 | 07SC                                                                                                 |
|     | AX-111802901 | 7D | 549281817 | 7.68848E-08 | 0.1241 | 0.0006 | 07SC, 09SC                                                                                           |
|     | AX-110446329 | 7D | 554832615 | 1.63784E-06 | 0.0643 | 0.0032 | 07SC                                                                                                 |
|     | AX-108770812 | 7D | 561926300 | 4.6784E-06  | 0.0669 | 0.0337 | 08HB                                                                                                 |
|     | AX-110016687 | 7D | 563051214 | 4.41684E-06 | 0.1063 | 0.0159 | 07SC, 09SC, 08HB                                                                                     |
|     | AX-110479115 | 7D | 628673559 | 1.31704E-05 | 0.0613 | 0.0476 | 08HB                                                                                                 |
| GWS | AX-108762060 | 1A | 535339729 | 6.65979E-07 | 0.0789 | 0.0021 | 09SC                                                                                                 |
|     | AX-110378928 | 1A | 544594957 | 6.00357E-06 | 0.0713 | 0.0072 | 09SC                                                                                                 |
|     | AX-109876087 | 1B | 373317133 | 8.05859E-06 | 0.0648 | 0.0220 | BLUP, 07HB, 08HB, 09HB, 07SD,<br>08SD, 09SD, 07SC, 08SC, 09SC, 07JS,<br>08JS, 09JS, 07SX, 08SX, 09SX |
|     | AX-109357181 | 1B | 432442476 | 5.43241E-07 | 0.0797 | 0.0021 | 09SC                                                                                                 |
|     | AX-94958010  | 1D | 407873959 | 1.38984E-06 | 0.0742 | 0.0022 | 09SC                                                                                                 |
|     | AX-112289622 | 1D | 423857541 | 3.13744E-06 | 0.0711 | 0.0042 | 09SC                                                                                                 |
|     | AX-111164067 | 1D | 457143978 | 7.9464E-06  | 0.0752 | 0.0087 | 09SC                                                                                                 |
|     | AX-110510923 | 1D | 488715446 | 8.27985E-07 | 0.0763 | 0.0021 | 09SC                                                                                                 |

|              |    |           |             |        |        |                                                                                                      |
|--------------|----|-----------|-------------|--------|--------|------------------------------------------------------------------------------------------------------|
| AX-111503398 | 2A | 33039673  | 6.02356E-06 | 0.0691 | 0.0072 | 09SC                                                                                                 |
| AX-111528573 | 2A | 160791894 | 9.05175E-07 | 0.0758 | 0.0021 | 09SC                                                                                                 |
| AX-108785539 | 2A | 254463285 | 3.53755E-06 | 0.0681 | 0.0046 | 09SC                                                                                                 |
| AX-109514485 | 2A | 284416547 | 8.94436E-06 | 0.0647 | 0.0237 | 07SC                                                                                                 |
| AX-110089394 | 2A | 364472672 | 3.94944E-06 | 0.0570 | 0.0140 | 08SX                                                                                                 |
| AX-110959136 | 2B | 431032607 | 0.000018    | 0.0578 | 0.0412 | BLUP                                                                                                 |
| AX-111038927 | 2B | 438977476 | 2.18414E-06 | 0.0709 | 0.0031 | 09SC                                                                                                 |
| AX-108838533 | 2D | 20349414  | 4.11952E-06 | 0.0691 | 0.0128 | BLUP, 09SD, 07SC, 09SX, 08JS,<br>09SC, 07JS, 08SC, 08SX, 09JS, 09HB,<br>07SX, 07HB, 08HB, 08SD       |
| AX-110819878 | 2D | 646216182 | 1.53782E-06 | 0.0742 | 0.0023 | 09SC                                                                                                 |
| AX-109298595 | 3A | 623906130 | 1.32059E-06 | 0.0748 | 0.0022 | 09SC                                                                                                 |
| AX-110020522 | 3A | 686168545 | 2.4511E-07  | 0.0845 | 0.0012 | BLUP, 07HB, 08HB, 09HB, 07SD,<br>08SD, 09SD, 07SC, 08SC, 09SC, 07JS,<br>08JS, 09JS, 07SX, 08SX, 09SX |
| AX-111652313 | 3A | 23395096  | 7.85848E-06 | 0.0653 | 0.0087 | 09SC                                                                                                 |
| AX-110186255 | 3A | 702511881 | 9.30623E-06 | 0.0763 | 0.0098 | 09SC                                                                                                 |
| AX-109518029 | 3B | 73581220  | 1.49648E-05 | 0.0595 | 0.0343 | 07SX                                                                                                 |
| AX-108975699 | 3B | 432339429 | 6.19208E-07 | 0.0784 | 0.0021 | 09SC                                                                                                 |
| AX-111074064 | 3B | 448624171 | 3.67377E-07 | 0.0815 | 0.0017 | 09SC                                                                                                 |
| AX-110379792 | 3B | 556404770 | 1.72881E-06 | 0.0730 | 0.0025 | 09SC                                                                                                 |
| AX-110142073 | 3B | 661319698 | 1.89117E-07 | 0.0862 | 0.0011 | BLUP, 07HB, 08HB, 09HB, 07SD,<br>08SD, 09SD, 07SC, 08SC, 09SC, 07JS,<br>08JS, 09JS, 07SX, 08SX, 09SX |
| AX-111502226 | 3B | 808674143 | 1.52921E-05 | 0.0601 | 0.0350 | 09HB                                                                                                 |
| AX-109445204 | 4A | 449503269 | 8.33212E-07 | 0.0764 | 0.0021 | 09SC                                                                                                 |
| AX-110649064 | 4A | 629360415 | 1.24343E-06 | 0.0765 | 0.0022 | 09SC                                                                                                 |
| AX-111600193 | 4A | 642368219 | 6.02072E-21 | 0.2894 | 0.0000 | BLUP, 07HB, 08HB, 09HB, 07SD,<br>08SD, 09SD, 07SC, 08SC, 09SC, 07JS,<br>08JS, 09JS, 07SX, 08SX, 09SX |
| AX-110630537 | 4A | 648132716 | 1.43362E-05 | 0.0611 | 0.0345 | BLUP, 07SD, 07JS                                                                                     |
| AX-111600426 | 4B | 202670514 | 6.6767E-07  | 0.0775 | 0.0021 | 09SC                                                                                                 |
| AX-110956540 | 4B | 480690287 | 1.81592E-05 | 0.0697 | 0.0165 | 09SC                                                                                                 |
| AX-110906507 | 4B | 498880068 | 1.43582E-06 | 0.0732 | 0.0022 | 09SC                                                                                                 |
| AX-110611733 | 4B | 638844521 | 1.02364E-05 | 0.0637 | 0.0302 | 08SD                                                                                                 |
| AX-109748035 | 4D | 126811725 | 1.38324E-06 | 0.0768 | 0.0022 | 09SC                                                                                                 |
| AX-109405031 | 4D | 455657955 | 1.97151E-05 | 0.0582 | 0.0377 | 07SX                                                                                                 |
| AX-108948329 | 5A | 5424728   | 1.11945E-05 | 0.0626 | 0.0106 | 09SC                                                                                                 |
| AX-110033504 | 5A | 21418196  | 7.98161E-12 | 0.1468 | 0.0000 | BLUP, 07HB, 08HB, 09HB, 07SD,<br>08SD, 09SD, 07SC, 08SC, 09SC, 07JS,<br>08JS, 09JS, 07SX, 08SX, 09SX |
| AX-109375676 | 5A | 87986938  | 1.18885E-05 | 0.0631 | 0.0331 | 08SD                                                                                                 |
| AX-110913131 | 5A | 702223672 | 1.00193E-05 | 0.0636 | 0.0256 | BLUP, 09HB, 07SX, 07JS, 07HB                                                                         |
| AX-108965399 | 5B | 75755638  | 1.22035E-06 | 0.0741 | 0.0022 | 09SC                                                                                                 |

|              |    |           |             |        |        |                                                                                                      |
|--------------|----|-----------|-------------|--------|--------|------------------------------------------------------------------------------------------------------|
| AX-109053557 | 5B | 230772130 | 1.80548E-05 | 0.0600 | 0.0165 | 09SC                                                                                                 |
| AX-111130645 | 5B | 266091663 | 1.45619E-06 | 0.0731 | 0.0022 | 09SC                                                                                                 |
| AX-111763500 | 5B | 392718723 | 2.14137E-06 | 0.0713 | 0.0083 | 09SD                                                                                                 |
| AX-109312330 | 5B | 403843374 | 1.64185E-05 | 0.0592 | 0.0344 | 07SX                                                                                                 |
| AX-108869145 | 5B | 579382749 | 1.11775E-06 | 0.0755 | 0.0022 | 09SC                                                                                                 |
| AX-110586945 | 5B | 584692291 | 2.23026E-06 | 0.0779 | 0.0082 | BLUP, 07HB, 08HB, 09HB, 07SD,<br>08SD, 09SD, 07SC, 08SC, 09SC, 07JS,<br>08JS, 09JS, 07SX, 08SX, 09SX |
| AX-95152512  | 5D | 14390791  | 5.96573E-16 | 0.2128 | 0.0000 | BLUP, 07HB, 08HB, 09HB, 07SD,<br>08SD, 09SD, 07SC, 08SC, 09SC, 07JS,<br>08JS, 09JS, 07SX, 08SX, 09SX |
| AX-109985361 | 5D | 440793779 | 7.86724E-07 | 0.0772 | 0.0021 | 09SC                                                                                                 |
| AX-111145700 | 5D | 446280843 | 1.07292E-05 | 0.0624 | 0.0245 | 09SD                                                                                                 |
| AX-111953544 | 5D | 552376367 | 1.76761E-05 | 0.0626 | 0.0408 | 07HB                                                                                                 |
| AX-86180093  | 5D | 560329049 | 5.40872E-17 | 0.2193 | 0.0000 | BLUP, 07HB, 08HB, 09HB, 07SD,<br>08SD, 09SD, 07SC, 08SC, 09SC, 07JS,<br>08JS, 09JS, 07SX, 08SX, 09SX |
| AX-110720861 | 6A | 25535895  | 7.83081E-06 | 0.0644 | 0.0215 | BLUP, 07HB, 08HB, 09HB, 07SD,<br>08SD, 09SD, 07SC, 08SC, 09SC, 07JS,<br>08JS, 09JS, 07SX, 08SX, 09SX |
| AX-111558975 | 6A | 415196444 | 6.15276E-06 | 0.0654 | 0.0185 | BLUP, 07HB, 08HB, 09HB, 07SD,<br>08SD, 09SD, 07SC, 08SC, 09SC, 07JS,<br>08JS, 09JS, 07SX, 08SX, 09SX |
| AX-108828019 | 6A | 596618565 | 1.34656E-06 | 0.0735 | 0.0022 | 09SC                                                                                                 |
| AX-109084084 | 6B | 567656373 | 8.76052E-11 | 0.1377 | 0.0000 | BLUP, 07HB, 08HB, 09HB, 07SD,<br>08SD, 09SD, 07SC, 08SC, 09SC, 07JS,<br>08JS, 09JS, 07SX, 08SX, 09SX |
| AX-111832727 | 6B | 644839261 | 8.96875E-06 | 0.0676 | 0.0226 | 09SD                                                                                                 |
| AX-110375590 | 6B | 690880940 | 1.24725E-06 | 0.0740 | 0.0022 | 09SC                                                                                                 |
| AX-109193807 | 6D | 14044251  | 9.68885E-06 | 0.0626 | 0.0258 | 08SX, 07SD                                                                                           |
| AX-109915068 | 6D | 46871266  | 3.96097E-06 | 0.0686 | 0.0139 | 07SD, 08SX                                                                                           |
| AX-95009966  | 6D | 68103868  | 6.99143E-06 | 0.0675 | 0.0182 | BLUP, 07HB, 09JS, 09SD, 09SC, 08JS,<br>07SX, 07JS, 07SC, 08SX, 07SD, 08SD,<br>08SC                   |
| AX-111064790 | 7A | 281664921 | 6.75395E-06 | 0.0698 | 0.0191 | BLUP, 09HB, 08SD, 07HB, 08SX,<br>08HB, 07SD, 07JS, 07SX, 08SC, 09JS                                  |
| AX-109878395 | 7A | 583728108 | 1.31572E-06 | 0.0741 | 0.0047 | 09HB                                                                                                 |
| AX-110391839 | 7A | 608877194 | 6.53096E-06 | 0.0658 | 0.0076 | 09SC                                                                                                 |
| AX-109832624 | 7A | 647142350 | 6.71089E-06 | 0.0657 | 0.0178 | 09SD                                                                                                 |
| AX-111818036 | 7A | 705499935 | 6.97999E-06 | 0.0664 | 0.0185 | 09HB                                                                                                 |
| AX-110163783 | 7A | 720923551 | 1.34676E-05 | 0.0617 | 0.0324 | 07SD                                                                                                 |
| AX-89376898  | 7B | 9801961   | 1.43198E-06 | 0.0734 | 0.0022 | 09SC                                                                                                 |
| AX-111128767 | 7B | 137452909 | 1.83237E-05 | 0.0607 | 0.0485 | 08HB                                                                                                 |
| AX-109306202 | 7B | 568676196 | 1.83584E-07 | 0.0864 | 0.0011 | BLUP, 07HB, 08HB, 09HB, 07SD,                                                                        |

|      |              |    |           |             |        |        |                                                                                                      |
|------|--------------|----|-----------|-------------|--------|--------|------------------------------------------------------------------------------------------------------|
|      |              |    |           |             |        |        | 08SD, 09SD, 07SC, 08SC, 09SC, 07JS,<br>08JS, 09JS, 07SX, 08SX, 09SX                                  |
|      | AX-89703681  | 7B | 639791862 | 1.03785E-05 | 0.0633 | 0.0245 | 09SC, 09JS, 09HB, 08SX, 08SC, 07HB                                                                   |
|      | AX-109309960 | 7D | 104334359 | 7.53019E-07 | 0.0768 | 0.0021 | 09SC                                                                                                 |
|      | AX-89393548  | 7D | 185764628 | 9.1714E-07  | 0.0757 | 0.0021 | 09SC                                                                                                 |
|      | AX-110045927 | 7D | 393955537 | 1.61217E-05 | 0.0604 | 0.0344 | 07SX                                                                                                 |
|      | AX-110913995 | 7D | 428054733 | 1.15813E-05 | 0.0630 | 0.0291 | BLUP, 07HB, 08HB, 09HB, 07SD,<br>08SD, 09SD, 07SC, 08SC, 09SC, 07JS,<br>08JS, 09JS, 07SX, 08SX, 09SX |
|      | AX-110967909 | 7D | 449077527 | 1.10617E-07 | 0.0964 | 0.0007 | BLUP, 07HB, 08HB, 09HB, 07SD,<br>08SD, 09SD, 07SC, 08SC, 09SC, 07JS,<br>08JS, 09JS, 07SX, 08SX, 09SX |
|      | AX-94382077  | 7D | 489903015 | 1.0039E-05  | 0.0632 | 0.0101 | 09SC                                                                                                 |
|      | AX-111802901 | 7D | 549281817 | 3.79229E-12 | 0.1483 | 0.0000 | BLUP, 09SC, 07HB, 09SX, 09SD,<br>07SX, 07SC, 08JS, 08SC, 07JS, 08SX,<br>08SD, 08HB, 09JS, 09HB       |
|      | AX-111175958 | 7D | 553415365 | 3.89521E-06 | 0.0683 | 0.0140 | 07SX                                                                                                 |
|      | AX-110446329 | 7D | 554832615 | 9.91941E-07 | 0.0653 | 0.0042 | BLUP, 07HB, 08HB, 09HB, 07SD,<br>08SD, 09SD, 07SC, 08SC, 09SC, 07JS,<br>08JS, 09JS, 07SX, 08SX, 09SX |
| TSNS | AX-111532463 | 1A | 227256286 | 1.58843E-05 | 0.0511 | 0.0182 | 08SD, 07HB                                                                                           |
|      | AX-111806559 | 1A | 449836347 | 1.83189E-05 | 0.0596 | 0.0243 | 07HB                                                                                                 |
|      | AX-110979338 | 1A | 477467390 | 8.25251E-06 | 0.0655 | 0.0127 | BLUP, 07HB, 09JS, 07SX, 09HB, 08SX,<br>08SD                                                          |
|      | AX-111166388 | 1A | 535329857 | 4.80243E-06 | 0.0631 | 0.0139 | 09JS, 08HB                                                                                           |
|      | AX-109895974 | 1B | 301047877 | 8.96464E-06 | 0.0647 | 0.0145 | 07SD, 09JS, 08SX                                                                                     |
|      | AX-109980222 | 1B | 410320741 | 1.19787E-05 | 0.0625 | 0.0195 | BLUP, 08SC, 09JS, 08JS, 08SX, 07SX                                                                   |
|      | AX-108928321 | 1B | 540990484 | 9.52681E-06 | 0.0644 | 0.0182 | 09SD, 08SD, 09JS, 08HB                                                                               |
|      | AX-111535339 | 1D | 11159521  | 1.11302E-05 | 0.0631 | 0.0508 | 09SC                                                                                                 |
|      | AX-110627624 | 1D | 40001986  | 2.24016E-06 | 0.0789 | 0.0060 | BLUP, 08HB, 09JS, 08JS, 07JS, 09SD,<br>07SX, 09HB, 08SD, 08SX, 07HB, 08SC                            |
|      | AX-111525866 | 1D | 263206152 | 4.21568E-07 | 0.1028 | 0.0014 | BLUP, 07HB, 08JS, 07JS, 08SD, 08SX,<br>09SD, 09SC, 09JS, 07SX, 08SC, 07SD,<br>09HB                   |
|      | AX-110016930 | 1D | 437447072 | 6.00689E-06 | 0.0667 | 0.0162 | 07SD                                                                                                 |
|      | AX-111946510 | 1D | 478865288 | 3.79793E-06 | 0.0723 | 0.0080 | BLUP, 08SX, 08SD, 07SX, 09HB                                                                         |
|      | AX-111584834 | 1D | 482206429 | 8.46349E-07 | 0.1146 | 0.0019 | BLUP, 07HB, 08HB, 09HB, 07SD,<br>08SD, 09SD, 08SC, 09SC, 07JS, 08JS,<br>09JS, 07SX, 08SX, 09SX       |
|      | AX-108842392 | 2A | 216080379 | 2.47265E-06 | 0.0734 | 0.0058 | 09JS, 07SD, 08SX, 07HB                                                                               |
|      | AX-108891065 | 2A | 247644605 | 7.14922E-07 | 0.1458 | 0.0072 | BLUP, 08SD, 07SX, 08SX, 09JS, 09HB,<br>08JS, 07HB, 08HB, 07JS, 09SD, 07SD,<br>09SC, 08SC, 09SX       |
|      | AX-109344129 | 2A | 717803941 | 1.45286E-05 | 0.0611 | 0.0261 | 07SD                                                                                                 |

|              |    |           |             |        |        |                                                                                          |
|--------------|----|-----------|-------------|--------|--------|------------------------------------------------------------------------------------------|
| AX-110563191 | 2B | 129524648 | 1.60117E-05 | 0.0606 | 0.0263 | 07SD                                                                                     |
| AX-108913586 | 2B | 439506437 | 3.23238E-06 | 0.0701 | 0.0063 | 08SD                                                                                     |
| AX-110412442 | 2B | 651722410 | 2.72556E-06 | 0.0874 | 0.0063 | BLUP, 08SX, 08SD, 09JS, 07SX, 08JS, 09HB, 07JS, 08SC, 07HB, 07SD, 08HB                   |
| AX-111551006 | 2B | 706931127 | 3.6193E-06  | 0.0701 | 0.0072 | BLUP, 08JS, 08SD, 09HB, 09JS, 07SX, 08SX                                                 |
| AX-111071301 | 2B | 753951280 | 1.61783E-05 | 0.0610 | 0.0263 | 07SD                                                                                     |
| AX-108838533 | 2D | 20349414  | 4.24079E-06 | 0.0729 | 0.0099 | BLUP, 09JS, 07HB, 08JS, 09HB, 07SD, 07JS, 07SX, 08SD, 08SX, 09SD, 08HB, 08SC             |
| AX-111772631 | 2D | 20982836  | 4.78691E-06 | 0.0689 | 0.0111 | BLUP, 09JS, 08SD, 07JS, 09SD, 09HB, 07SX, 08SX, 08HB, 08JS                               |
| AX-108885347 | 2D | 78347091  | 1.75455E-05 | 0.0615 | 0.0173 | 08SD                                                                                     |
| AX-109508682 | 2D | 247376233 | 5.24322E-06 | 0.0626 | 0.0140 | 09JS, 08HB                                                                               |
| AX-94484517  | 2D | 576287763 | 5.33787E-06 | 0.0676 | 0.0672 | 09SX                                                                                     |
| AX-110004274 | 2D | 611223448 | 1.08112E-05 | 0.0639 | 0.0165 | 07HB, 08SD, 08JS                                                                         |
| AX-111542571 | 2D | 630384874 | 1.32961E-05 | 0.0619 | 0.0194 | 09JS, 09HB                                                                               |
| AX-111039910 | 3A | 23455186  | 4.08523E-06 | 0.0784 | 0.0079 | BLUP, 08SD, 07HB, 07SX, 08JS, 09HB, 08SX                                                 |
| AX-111215306 | 3A | 196496769 | 3.97965E-06 | 0.0676 | 0.0062 | 09JS                                                                                     |
| AX-109345729 | 3A | 483161117 | 7.57802E-06 | 0.0681 | 0.0131 | 08SD, 08SX                                                                               |
| AX-110192525 | 3A | 511277955 | 1.53094E-05 | 0.0608 | 0.0263 | 07SD                                                                                     |
| AX-109060938 | 3A | 537446832 | 1.5462E-05  | 0.0608 | 0.0174 | 09JS                                                                                     |
| AX-89381998  | 3A | 637901043 | 7.12095E-06 | 0.0645 | 0.0224 | 08SC                                                                                     |
| AX-109870394 | 3A | 673499714 | 3.37121E-06 | 0.0692 | 0.0089 | 07HB                                                                                     |
| AX-110589268 | 3A | 729951582 | 1.42015E-05 | 0.0608 | 0.0261 | 07HB, 08HB                                                                               |
| AX-111031240 | 3A | 730657087 | 1.36517E-05 | 0.0623 | 0.0261 | 07SD                                                                                     |
| AX-110389997 | 3B | 690013860 | 4.07679E-06 | 0.0684 | 0.0062 | 09JS                                                                                     |
| AX-109327802 | 4A | 118749371 | 9.81419E-06 | 0.0644 | 0.0160 | 07HB, 08SD, 08JS                                                                         |
| AX-109272207 | 4A | 133050366 | 4.8286E-06  | 0.0567 | 0.0070 | 09JS                                                                                     |
| AX-110432225 | 4A | 239579500 | 7.14337E-06 | 0.0664 | 0.0106 | 08SD                                                                                     |
| AX-111150736 | 4A | 250043694 | 7.42786E-06 | 0.0651 | 0.0106 | 08SD                                                                                     |
| AX-109841603 | 4A | 615169027 | 5.37498E-06 | 0.0705 | 0.0103 | BLUP, 08SX, 07JS, 09HB                                                                   |
| AX-111600193 | 4A | 642368219 | 5.41604E-08 | 0.1750 | 0.0009 | BLUP, 07HB, 08HB, 09HB, 07SD, 08SD, 09SD, 08SC, 09SC, 07JS, 08JS, 09JS, 07SX, 08SX, 09SX |
| AX-111031196 | 4B | 149302606 | 1.04063E-05 | 0.0638 | 0.0165 | BLUP, 09JS, 08SD, 08JS, 07SX                                                             |
| AX-111680609 | 4B | 160309672 | 1.23488E-05 | 0.0622 | 0.0186 | 07HB, 08SD, 08JS                                                                         |
| AX-111046402 | 4B | 602873780 | 1.94588E-05 | 0.0591 | 0.0246 | 07HB                                                                                     |
| AX-169336707 | 4D | 63        | 1.51429E-05 | 0.0605 | 0.0206 | BLUP, 07HB                                                                               |
| AX-109986929 | 4D | 138       | 7.72359E-06 | 0.0662 | 0.0106 | 08SD                                                                                     |
| AX-169337600 | 4D | 372       | 1.12276E-05 | 0.0637 | 0.0169 | 08SD, 08SX                                                                               |
| AX-169338181 | 4D | 433       | 1.59585E-05 | 0.0607 | 0.0171 | 08SD                                                                                     |
| AX-111020167 | 4D | 471230915 | 1.14674E-05 | 0.0621 | 0.0232 | 08JS                                                                                     |

|              |    |           |             |        |        |                                                                                          |
|--------------|----|-----------|-------------|--------|--------|------------------------------------------------------------------------------------------|
| AX-108769602 | 5A | 483720326 | 1.97252E-05 | 0.0597 | 0.0310 | 07SD                                                                                     |
| AX-109893358 | 5A | 480515122 | 6.93657E-06 | 0.0650 | 0.0134 | 07HB                                                                                     |
| AX-109897379 | 5A | 454825148 | 3.45097E-06 | 0.0761 | 0.0085 | BLUP, 09JS, 09HB, 07JS, 08JS, 07SX, 07HB, 08SC                                           |
| AX-108844453 | 5A | 453892447 | 2.96599E-06 | 0.0767 | 0.0097 | BLUP, 09JS, 08SX, 09HB, 07HB, 07JS, 08JS, 09SD, 07SX, 08SD, 08SC, 09SC                   |
| AX-110015801 | 5A | 391825899 | 9.29643E-06 | 0.0641 | 0.0120 | 09JS                                                                                     |
| AX-111043300 | 5B | 296585755 | 7.42764E-06 | 0.0702 | 0.0122 | 08SD, 09JS, 09HB, 07HB                                                                   |
| AX-111541781 | 5B | 377348917 | 4.87009E-06 | 0.0646 | 0.0093 | 09JS, 08SX, 07SD, 07SX                                                                   |
| AX-110433913 | 5B | 490949803 | 1.28727E-05 | 0.0624 | 0.0261 | 07SD                                                                                     |
| AX-111495704 | 5B | 645995677 | 1.83037E-05 | 0.0603 | 0.0243 | 07HB                                                                                     |
| AX-109025858 | 5B | 654955111 | 7.01437E-06 | 0.0649 | 0.0252 | 08HB                                                                                     |
| AX-95152512  | 5D | 14390791  | 1.12069E-06 | 0.1218 | 0.0034 | BLUP, 08SD, 08SX, 07SX, 08JS, 09JS, 09HB, 07HB, 07JS, 09SD, 09SC, 07SD, 08SC, 08HB       |
| AX-109963035 | 5D | 237028854 | 1.02354E-05 | 0.0666 | 0.0156 | BLUP, 07JS                                                                               |
| AX-110616233 | 5D | 434403329 | 1.07305E-05 | 0.0627 | 0.0170 | 07HB                                                                                     |
| AX-109809706 | 5D | 476819411 | 9.33997E-06 | 0.0647 | 0.0161 | BLUP, 08SX, 07SX, 08SD, 09SD, 09HB, 08JS                                                 |
| AX-108898503 | 5D | 554823716 | 4.22984E-06 | 0.0682 | 0.0107 | BLUP, 07SX, 09HB, 07HB, 08SC, 09SD                                                       |
| AX-86180093  | 5D | 560329049 | 3.54393E-08 | 0.1654 | 0.0009 | BLUP, 07HB, 08HB, 09HB, 07SD, 08SD, 09SD, 08SC, 09SC, 07JS, 08JS, 09JS, 07SX, 08SX, 09SX |
| AX-110946238 | 6A | 18461050  | 2.72186E-06 | 0.0709 | 0.0057 | 08SD                                                                                     |
| AX-110012125 | 6A | 614387818 | 1.07692E-05 | 0.0622 | 0.0170 | 07HB                                                                                     |
| AX-111686735 | 6B | 144960242 | 7.92752E-06 | 0.0691 | 0.0144 | 08SX, 09JS, 08SD, 07SD, 09SD                                                             |
| AX-109317829 | 6B | 236329093 | 4.03136E-06 | 0.0676 | 0.0062 | 09JS                                                                                     |
| AX-109084084 | 6B | 567656373 | 8.56466E-07 | 0.1028 | 0.0040 | BLUP, 08SX, 09HB, 08SD, 07SX, 09JS, 08JS, 07HB, 09SD, 07JS, 07SD, 08HB, 09SC             |
| AX-110547035 | 6B | 662869250 | 1.68081E-05 | 0.0600 | 0.1410 | 09SX                                                                                     |
| AX-94689627  | 6D | 3917286   | 1.0667E-05  | 0.0636 | 0.0245 | 07SD                                                                                     |
| AX-109940039 | 6D | 20554955  | 1.26073E-05 | 0.0618 | 0.0261 | 07SD                                                                                     |
| AX-109883908 | 6D | 238655244 | 1.96375E-05 | 0.0599 | 0.0180 | 08SD                                                                                     |
| AX-111542213 | 7A | 4553945   | 7.75608E-06 | 0.0651 | 0.0106 | 08SD                                                                                     |
| AX-89542612  | 7A | 42500139  | 7.96349E-07 | 0.0782 | 0.0043 | 07SD                                                                                     |
| AX-110023271 | 7A | 114087145 | 9.01634E-06 | 0.0639 | 0.0114 | 08SD                                                                                     |
| AX-109994561 | 7A | 485512306 | 3.85891E-06 | 0.0693 | 0.0080 | BLUP, 09JS, 07JS, 08JS, 07HB                                                             |
| AX-109397893 | 7A | 673854089 | 7.23749E-06 | 0.0652 | 0.0170 | 09JS, 08HB                                                                               |
| AX-111082615 | 7B | 43512368  | 1.06147E-05 | 0.0531 | 0.0199 | 09JS, 07SD, 07JS                                                                         |
| AX-94592534  | 7B | 496271774 | 3.68902E-06 | 0.0713 | 0.0069 | BLUP, 07SX, 09JS, 08SD, 08SX, 07SD                                                       |
| AX-110366783 | 7B | 711490256 | 1.01088E-05 | 0.0644 | 0.0162 | 07JS, 08SC, 07HB, 09JS, 07SX, 08JS                                                       |
| AX-108911221 | 7D | 4991311   | 9.97729E-07 | 0.0726 | 0.0040 | BLUP, 09HB, 09JS, 08SX, 09SC, 07JS, 08JS, 08SD, 07SX, 07SD, 08SC, 09SD,                  |



|      |              |    |           |             |        |        |                                                                                          |
|------|--------------|----|-----------|-------------|--------|--------|------------------------------------------------------------------------------------------|
|      |              |    |           |             |        |        | 09SX, 07HB                                                                               |
|      | AX-109943058 | 7D | 14887102  | 8.49253E-06 | 0.0647 | 0.0113 | 09JS                                                                                     |
|      | AX-111034889 | 7D | 22777210  | 7.63352E-06 | 0.0651 | 0.0106 | 08SD                                                                                     |
|      | AX-86172687  | 7D | 23495477  | 1.24205E-06 | 0.0836 | 0.0034 | BLUP, 09JS, 07JS, 08SC, 07SX, 08JS,<br>08HB, 07HB, 09HB, 08SX, 09SD                      |
|      | AX-111197303 | 7D | 47422389  | 5.79497E-06 | 0.0570 | 0.0093 | BLUP, 09HB, 07SX, 08SD                                                                   |
|      | AX-110127261 | 7D | 184864253 | 8.58013E-06 | 0.0643 | 0.0111 | 08SD                                                                                     |
|      | AX-111218083 | 7D | 191831492 | 1.08514E-05 | 0.0626 | 0.0171 | 08SX, 07SD, 09JS                                                                         |
|      | AX-109656174 | 7D | 202543550 | 1.34045E-05 | 0.0623 | 0.0192 | 07HB, 08SD, 08JS                                                                         |
|      | AX-108948827 | 7D | 265009497 | 3.06426E-06 | 0.0701 | 0.0062 | 08SD                                                                                     |
|      | AX-94501611  | 7D | 355562613 | 2.10744E-06 | 0.0724 | 0.0049 | 08SD                                                                                     |
|      | AX-111503444 | 7D | 393285287 | 1.41242E-06 | 0.0897 | 0.0038 | BLUP, 08SX, 08SD, 09HB, 08JS, 09JS,<br>07JS, 07SD, 09SD, 07SX, 07HB, 08HB                |
|      | AX-110967909 | 7D | 449077527 | 1.33549E-05 | 0.0639 | 0.0228 | BLUP, 08SX, 07JS                                                                         |
|      | AX-109391680 | 7D | 469085796 | 1.11516E-05 | 0.0532 | 0.0175 | 07HB, 08SD, 08JS                                                                         |
|      | AX-110826342 | 7D | 480123355 | 5.01366E-06 | 0.0572 | 0.0084 | 08SD                                                                                     |
|      | AX-108838800 | 7D | 524655072 | 1.80084E-06 | 0.0879 | 0.0072 | BLUP, 08SX, 08HB, 09JS, 08JS, 07SX,<br>08SD, 07SD, 07JS, 09SC                            |
|      | AX-110362518 | 7D | 529688251 | 5.08747E-06 | 0.0611 | 0.0142 | 09JS, 08HB                                                                               |
|      | AX-111505223 | 7D | 544997456 | 1.91238E-05 | 0.0602 | 0.0180 | 08SD                                                                                     |
|      | AX-111802901 | 7D | 549281817 | 1.22859E-07 | 0.1144 | 0.0007 | BLUP, 09HB, 09JS, 08SD, 08JS, 07HB,<br>07SX, 07JS, 08SX, 09SD, 07SD, 08SC,<br>08HB, 09SC |
|      | AX-110446329 | 7D | 554832615 | 3.00745E-06 | 0.0627 | 0.0066 | BLUP, 08HB, 09JS, 08SX, 07JS, 08JS,<br>08SD, 09SD, 07SX, 09HB                            |
|      | AX-108770812 | 7D | 561926300 | 2.02598E-06 | 0.0725 | 0.0049 | 08SD                                                                                     |
|      | AX-110016687 | 7D | 563051214 | 4.55481E-07 | 0.1082 | 0.0013 | BLUP, 08SD, 08HB, 07HB, 08SX,<br>09HB, 09JS, 07SX, 08JS, 09SC, 09SD,<br>07JS, 08SC, 07SD |
|      | AX-94583542  | 7D | 616037747 | 1.03586E-05 | 0.0639 | 0.0161 | BLUP, 08SD, 07HB, 08JS                                                                   |
| FSNS | AX-110979338 | 1A | 477467390 | 1.40217E-05 | 0.0602 | 0.1007 | 09SD                                                                                     |
|      | AX-111531574 | 1B | 554497309 | 7.02812E-07 | 0.0776 | 0.0059 | 09HB                                                                                     |
|      | AX-108758276 | 1B | 647870029 | 2.77232E-06 | 0.0710 | 0.0378 | 07SD                                                                                     |
|      | AX-111525866 | 1D | 263206152 | 2.79464E-06 | 0.0749 | 0.0208 | 09HB, 09JS                                                                               |
|      | AX-108891065 | 2A | 247644605 | 5.77319E-06 | 0.0685 | 0.0343 | BLUP, 08JS, 09JS, 07JS                                                                   |
|      | AX-109599637 | 2A | 315321960 | 1.93175E-05 | 0.0628 | 0.0648 | 07JS                                                                                     |
|      | AX-110529731 | 2A | 734391881 | 1.60697E-05 | 0.0599 | 0.1083 | 07HB                                                                                     |
|      | AX-110412442 | 2B | 651722410 | 2.96355E-06 | 0.0708 | 0.0332 | BLUP, 09SD                                                                               |
|      | AX-89577616  | 3D | 355222696 | 1.55467E-05 | 0.0508 | 0.0648 | 07JS                                                                                     |
|      | AX-111600193 | 4A | 642368219 | 3.6542E-07  | 0.1041 | 0.0075 | BLUP, 07JS, 08JS, 09JS, 09SD, 07HB,<br>09HB, 08SC, 08HB, 09SC, 07SD                      |
|      | AX-110963243 | 4B | 171658915 | 1.72338E-05 | 0.0641 | 0.1083 | 07HB                                                                                     |
|      | AX-111620283 | 4D | 101445917 | 1.22521E-05 | 0.0639 | 0.1033 | 07HB                                                                                     |
|      | AX-110036471 | 5A | 449037663 | 4.68903E-07 | 0.0837 | 0.0036 | BLUP, 08JS, 07JS                                                                         |

|      |              |    |           |             |        |        |                                                            |
|------|--------------|----|-----------|-------------|--------|--------|------------------------------------------------------------|
|      | AX-111043300 | 5B | 296585755 | 1.42635E-06 | 0.0770 | 0.0104 | BLUP, 07JS, 08JS                                           |
|      | AX-109860828 | 5B | 422030835 | 1.25493E-06 | 0.0747 | 0.0079 | 09HB                                                       |
|      | AX-108891984 | 5B | 565531627 | 1.73494E-05 | 0.0598 | 0.0648 | 07JS                                                       |
|      | AX-95152512  | 5D | 14390791  | 1.63556E-06 | 0.0928 | 0.0157 | BLUP, 07HB, 08HB, 09HB, 07JS, 08JS, 09JS, 08SC, 07SD       |
|      | AX-94567087  | 5D | 478739552 | 9.82711E-06 | 0.0659 | 0.1651 | 09SC                                                       |
|      | AX-89675057  | 5D | 538012085 | 1.44526E-05 | 0.0613 | 0.0648 | 07JS                                                       |
|      | AX-109274468 | 5D | 543650147 | 1.57985E-06 | 0.0744 | 0.0378 | 07SD                                                       |
|      | AX-94413800  | 5D | 547527234 | 5.86471E-06 | 0.0667 | 0.0492 | 07SD                                                       |
|      | AX-86180093  | 5D | 560329049 | 1.87908E-06 | 0.1053 | 0.0240 | BLUP, 07JS, 08JS, 09JS, 08SC, 09HB, 09SD, 07HB, 07SD, 09SC |
|      | AX-111554374 | 6A | 84033013  | 8.42719E-06 | 0.0668 | 0.0323 | BLUP, 09HB, 07JS                                           |
|      | AX-108831922 | 6A | 558112855 | 7.49494E-06 | 0.0657 | 0.0308 | 09HB                                                       |
|      | AX-110433950 | 6B | 171767664 | 5.36378E-06 | 0.0669 | 0.0338 | 07JS                                                       |
|      | AX-109084084 | 6B | 567656373 | 3.67453E-06 | 0.0821 | 0.0309 | BLUP, 09JS, 08JS, 07JS, 09SD, 07HB                         |
|      | AX-109476705 | 6B | 614603892 | 0.0000144   | 0.0611 | 0.0558 | BLUP                                                       |
|      | AX-89324800  | 6D | 4371990   | 5.05446E-06 | 0.0674 | 0.0492 | 07SD                                                       |
|      | AX-109528482 | 6D | 65642547  | 5.17593E-06 | 0.0653 | 0.0593 | 09SD                                                       |
|      | AX-108918745 | 6D | 427484647 | 3.00037E-06 | 0.0715 | 0.0378 | 07SD                                                       |
|      | AX-111473122 | 7A | 16653198  | 1.10004E-05 | 0.0626 | 0.0554 | 07JS                                                       |
|      | AX-110023271 | 7A | 114087145 | 3.42641E-06 | 0.0871 | 0.0346 | BLUP, 07JS, 08JS, 09JS, 09HB, 09SD, 08SC                   |
|      | AX-109994561 | 7A | 485512306 | 5.44985E-06 | 0.0664 | 0.0250 | 09HB                                                       |
|      | AX-110020351 | 7B | 327102495 | 3.62311E-06 | 0.0581 | 0.0456 | 07HB                                                       |
|      | AX-109822071 | 7B | 524601841 | 5.14649E-06 | 0.0677 | 0.0250 | 09HB                                                       |
|      | AX-109429982 | 7B | 660663186 | 2.45955E-06 | 0.0723 | 0.0138 | 09HB                                                       |
|      | AX-110503493 | 7D | 40499462  | 4.54152E-06 | 0.0713 | 0.0181 | 09JS, 09HB                                                 |
|      | AX-111503444 | 7D | 393285287 | 8.88556E-06 | 0.0646 | 0.0971 | BLUP, 08JS, 08SC, 08HB                                     |
|      | AX-110349900 | 7D | 528073469 | 1.31096E-05 | 0.0618 | 0.0643 | 09HB, 09JS                                                 |
|      | AX-109742925 | 7D | 548906076 | 1.58443E-05 | 0.0603 | 0.0796 | 08JS                                                       |
|      | AX-111802901 | 7D | 549281817 | 0.00000525  | 0.0662 | 0.0240 | BLUP                                                       |
| SNPP | AX-110563049 | 1A | 15905547  | 0.0000122   | 0.0615 | 0.0077 | BLUP                                                       |
|      | AX-110375459 | 1A | 55931109  | 0.0000172   | 0.0587 | 0.0077 | BLUP                                                       |
|      | AX-109841934 | 1A | 74429581  | 0.00000451  | 0.0660 | 0.0060 | BLUP                                                       |
|      | AX-111736507 | 1A | 101770682 | 0.00000524  | 0.0657 | 0.0060 | BLUP                                                       |
|      | AX-111681662 | 1A | 480954488 | 0.0000121   | 0.0510 | 0.0077 | BLUP                                                       |
|      | AX-110597912 | 1A | 537536897 | 0.00000644  | 0.0645 | 0.0065 | BLUP                                                       |
|      | AX-108770381 | 1A | 547718158 | 1.68233E-06 | 0.0717 | 0.0809 | 08JS                                                       |
|      | AX-110480800 | 1A | 548491178 | 1.88214E-05 | 0.0585 | 0.0395 | 08SX                                                       |
|      | AX-110595289 | 1A | 582835553 | 0.0000168   | 0.0493 | 0.0077 | BLUP                                                       |
|      | AX-109895974 | 1B | 301047877 | 1.66149E-05 | 0.0591 | 0.0836 | 08HB                                                       |
|      | AX-109876087 | 1B | 373317133 | 7.63474E-06 | 0.0661 | 0.0170 | BLUP, 08SX, 09SX, 07SX, 08SD                               |
|      | AX-109302867 | 1B | 383054878 | 1.07455E-05 | 0.0617 | 0.0770 | 08HB                                                       |
|      | AX-109347269 | 1B | 409702951 | 0.00000212  | 0.0703 | 0.0046 | BLUP                                                       |

|              |    |           |             |        |        |                              |
|--------------|----|-----------|-------------|--------|--------|------------------------------|
| AX-109032696 | 1B | 442501925 | 8.7638E-06  | 0.0627 | 0.0770 | 08HB                         |
| AX-111087865 | 1B | 542639626 | 0.00000461  | 0.0661 | 0.0060 | BLUP                         |
| AX-109951074 | 1B | 681503047 | 0.00000912  | 0.0623 | 0.0073 | BLUP                         |
| AX-111561055 | 1D | 13796245  | 0.0000172   | 0.0494 | 0.0077 | BLUP                         |
| AX-110296535 | 1D | 21640510  | 0.0000166   | 0.0588 | 0.0077 | BLUP                         |
| AX-108883328 | 1D | 30879589  | 0.00000316  | 0.0684 | 0.0053 | BLUP                         |
| AX-109887148 | 1D | 38521795  | 0.0000175   | 0.0586 | 0.0077 | BLUP                         |
| AX-110434289 | 1D | 46215179  | 1.95732E-05 | 0.0587 | 0.0898 | 08HB                         |
| AX-111525866 | 1D | 263206152 | 4.65581E-08 | 0.0930 | 0.0005 | 09JS                         |
| AX-111066559 | 1D | 278099919 | 3.4616E-06  | 0.0673 | 0.1743 | 07HB                         |
| AX-108842392 | 2A | 216080379 | 1.49145E-05 | 0.0597 | 0.0836 | 08HB                         |
| AX-108891065 | 2A | 247644605 | 1.07453E-07 | 0.0878 | 0.0008 | 09JS                         |
| AX-111263159 | 2A | 256849714 | 0.00000699  | 0.0636 | 0.0065 | BLUP                         |
| AX-110921503 | 2B | 8351159   | 0.0000185   | 0.0582 | 0.0078 | BLUP                         |
| AX-108846215 | 2B | 139386906 | 0.00000936  | 0.0629 | 0.0073 | BLUP                         |
| AX-110974562 | 2B | 190657526 | 0.000018    | 0.0583 | 0.0077 | BLUP                         |
| AX-108838753 | 2B | 244212095 | 0.00000699  | 0.0640 | 0.0065 | BLUP                         |
| AX-109517040 | 2B | 596918194 | 0.000000941 | 0.0755 | 0.0028 | BLUP                         |
| AX-109919527 | 2B | 622066161 | 8.98669E-06 | 0.0636 | 0.0906 | 08JS                         |
| AX-111762792 | 2B | 785093834 | 0.0000177   | 0.0584 | 0.0077 | BLUP                         |
| AX-111531844 | 2B | 795488728 | 0.0000159   | 0.0591 | 0.0077 | BLUP                         |
| AX-108838533 | 2D | 20349414  | 5.4284E-06  | 0.0655 | 0.0157 | BLUP, 08SX, 07SX, 09SX, 08SD |
| AX-111772631 | 2D | 20982836  | 9.24245E-08 | 0.0893 | 0.0008 | 09JS                         |
| AX-110480398 | 2D | 60951241  | 0.0000116   | 0.0513 | 0.0077 | BLUP                         |
| AX-111304532 | 2D | 63742084  | 0.0000116   | 0.0512 | 0.0077 | BLUP                         |
| AX-109503554 | 2D | 71459296  | 1.21438E-05 | 0.0614 | 0.0290 | 07SX                         |
| AX-110391203 | 2D | 304264498 | 0.00000446  | 0.0661 | 0.0060 | BLUP                         |
| AX-111016259 | 2D | 571001937 | 0.00000252  | 0.0693 | 0.0051 | BLUP                         |
| AX-110574174 | 2D | 607416371 | 0.0000175   | 0.0585 | 0.0077 | BLUP                         |
| AX-111611367 | 3A | 36657625  | 0.0000124   | 0.0509 | 0.0077 | BLUP                         |
| AX-108972085 | 3A | 37823933  | 0.00000985  | 0.0617 | 0.0074 | BLUP                         |
| AX-110570804 | 3A | 69061323  | 0.00000358  | 0.0674 | 0.0058 | BLUP                         |
| AX-108938752 | 3A | 524768985 | 0.00000893  | 0.0628 | 0.0073 | BLUP                         |
| AX-109474344 | 3A | 544461911 | 1.52402E-06 | 0.0724 | 0.0191 | 08HB                         |
| AX-109851882 | 3A | 653326855 | 0.00000776  | 0.0632 | 0.0067 | BLUP                         |
| AX-109612604 | 3A | 663669493 | 0.00000701  | 0.0638 | 0.0065 | BLUP                         |
| AX-110020522 | 3A | 686168545 | 2.43157E-07 | 0.0830 | 0.0012 | BLUP, 07SX, 08SX, 09SX, 08SD |
| AX-111701890 | 3A | 718808256 | 0.0000174   | 0.0586 | 0.0077 | BLUP                         |
| AX-109110573 | 3B | 240483400 | 0.00000806  | 0.0629 | 0.0069 | BLUP                         |
| AX-111564046 | 3B | 419278534 | 0.00000532  | 0.0652 | 0.0060 | BLUP                         |
| AX-111474667 | 3B | 477364176 | 0.00000424  | 0.0663 | 0.0059 | BLUP                         |
| AX-109365701 | 3B | 512507145 | 1.38074E-05 | 0.0618 | 0.1347 | 07SD                         |
| AX-111286422 | 3B | 572601237 | 0.00000412  | 0.0666 | 0.0059 | BLUP                         |
| AX-110142073 | 3B | 661319698 | 1.95209E-07 | 0.0845 | 0.0011 | BLUP, 07SX, 08SX, 09SX, 08SD |

|              |    |           |             |        |        |                                                |
|--------------|----|-----------|-------------|--------|--------|------------------------------------------------|
| AX-109396253 | 3B | 762092326 | 7.52252E-06 | 0.0650 | 0.0699 | BLUP, 07SD                                     |
| AX-108837323 | 3B | 780329971 | 1.9613E-05  | 0.0578 | 0.0429 | 07SX                                           |
| AX-109981452 | 3D | 6728754   | 5.76359E-06 | 0.0643 | 0.0809 | 08JS                                           |
| AX-111080889 | 3D | 47497225  | 0.000017    | 0.0587 | 0.0077 | BLUP                                           |
| AX-109179417 | 3D | 128789720 | 0.00000305  | 0.0682 | 0.0053 | BLUP                                           |
| AX-109471652 | 3D | 268152441 | 0.00000585  | 0.0648 | 0.0061 | BLUP                                           |
| AX-108796887 | 3D | 309005096 | 0.0000102   | 0.0519 | 0.0075 | BLUP                                           |
| AX-108765756 | 3D | 604157383 | 0.00000199  | 0.0801 | 0.0046 | BLUP                                           |
| AX-109627140 | 4A | 122281521 | 0.000018    | 0.0585 | 0.0077 | BLUP                                           |
| AX-109066809 | 4A | 179941571 | 0.000000606 | 0.0822 | 0.0023 | BLUP                                           |
| AX-109465075 | 4A | 206684337 | 0.0000165   | 0.0589 | 0.0077 | BLUP                                           |
| AX-111600193 | 4A | 642368219 | 8.34307E-07 | 0.2087 | 0.0128 | BLUP, 07SX, 08SX, 08SD, 09SX, 09JS, 09SD, 08JS |
| AX-109845365 | 4A | 706599745 | 0.0000169   | 0.0593 | 0.0077 | BLUP                                           |
| AX-109901718 | 4A | 715743670 | 0.0000127   | 0.0605 | 0.0077 | BLUP                                           |
| AX-110925399 | 4B | 51858889  | 0.00000605  | 0.0644 | 0.0062 | BLUP                                           |
| AX-111031196 | 4B | 149302606 | 0.0000121   | 0.0621 | 0.0077 | BLUP                                           |
| AX-109400188 | 4B | 459007802 | 0.00000507  | 0.0653 | 0.0060 | BLUP                                           |
| AX-110442771 | 4B | 466640145 | 0.0000169   | 0.0587 | 0.0077 | BLUP                                           |
| AX-108941085 | 4B | 608942788 | 0.0000196   | 0.0580 | 0.0081 | BLUP                                           |
| AX-110445790 | 4B | 646452051 | 2.35759E-06 | 0.0694 | 0.0085 | 07SX                                           |
| AX-169337207 | 4D | 258       | 2.12783E-06 | 0.0742 | 0.0066 | BLUP, 09HB                                     |
| AX-110033504 | 5A | 21418196  | 8.92645E-12 | 0.1447 | 0.0000 | BLUP, 07SX, 08SX, 09SX, 08SD                   |
| AX-109884758 | 5A | 463520339 | 2.20466E-06 | 0.0605 | 0.0079 | 08SX                                           |
| AX-108741695 | 5A | 519880017 | 0.0000143   | 0.0597 | 0.0077 | BLUP                                           |
| AX-109952547 | 5A | 568087699 | 0.00000743  | 0.0633 | 0.0066 | BLUP                                           |
| AX-111051748 | 5B | 44358277  | 6.7909E-07  | 0.0667 | 0.0029 | 08SX                                           |
| AX-111723779 | 5B | 142666541 | 0.0000107   | 0.0617 | 0.0076 | BLUP                                           |
| AX-111043300 | 5B | 296585755 | 5.09216E-06 | 0.0665 | 0.0214 | 09JS                                           |
| AX-110576186 | 5B | 398060370 | 0.0000155   | 0.0602 | 0.0077 | BLUP                                           |
| AX-111556817 | 5B | 404142346 | 0.0000144   | 0.0596 | 0.0077 | BLUP                                           |
| AX-111552581 | 5B | 448128619 | 0.00000164  | 0.0728 | 0.0039 | BLUP                                           |
| AX-110924307 | 5B | 514686625 | 1.06114E-05 | 0.0624 | 0.1347 | 07SD                                           |
| AX-110369532 | 5B | 566494041 | 1.03792E-06 | 0.0741 | 0.0191 | 08HB                                           |
| AX-110586945 | 5B | 584692291 | 2.18909E-06 | 0.0785 | 0.0081 | BLUP, 07SX, 08SX, 09SX, 08SD                   |
| AX-95152512  | 5D | 14390791  | 2.20231E-06 | 0.1796 | 0.0329 | BLUP, 07SX, 08SX, 09SX, 08SD, 09JS             |
| AX-110379095 | 5D | 193521326 | 0.0000148   | 0.0594 | 0.0077 | BLUP                                           |
| AX-108986002 | 5D | 213131917 | 0.0000156   | 0.0601 | 0.0077 | BLUP                                           |
| AX-89349755  | 5D | 250056711 | 0.00000501  | 0.0654 | 0.0060 | BLUP                                           |
| AX-111607088 | 5D | 382077176 | 0.00000976  | 0.0617 | 0.0074 | BLUP                                           |
| AX-108865212 | 5D | 415746946 | 0.0000147   | 0.0595 | 0.0077 | BLUP                                           |
| AX-95203327  | 5D | 462083496 | 0.0000172   | 0.0586 | 0.0077 | BLUP                                           |
| AX-86180093  | 5D | 560329049 | 5.87572E-07 | 0.1915 | 0.0148 | BLUP, 07SX, 08SX, 08SD, 09SX, 09JS, 09SD       |

|              |    |           |             |        |        |                                    |
|--------------|----|-----------|-------------|--------|--------|------------------------------------|
| AX-111259000 | 6A | 7054819   | 0.0000176   | 0.0585 | 0.0077 | BLUP                               |
| AX-111233375 | 6A | 18560088  | 0.00000424  | 0.0675 | 0.0059 | BLUP                               |
| AX-110720861 | 6A | 25535895  | 7.37831E-06 | 0.0644 | 0.0183 | BLUP, 07SX, 08SX, 09SX, 08SD       |
| AX-109904205 | 6A | 228192127 | 1.2427E-05  | 0.0610 | 0.0300 | 08SX                               |
| AX-111565588 | 6A | 270300881 | 0.0000141   | 0.0597 | 0.0077 | BLUP                               |
| AX-111558975 | 6A | 415196444 | 5.33835E-06 | 0.0660 | 0.0138 | BLUP, 07SX, 08SX, 09SX, 08SD       |
| AX-108908139 | 6B | 99681079  | 0.000000815 | 0.0772 | 0.0027 | BLUP                               |
| AX-111686735 | 6B | 144960242 | 6.78395E-07 | 0.0766 | 0.0191 | 08HB                               |
| AX-111082654 | 6B | 343970282 | 0.0000134   | 0.0600 | 0.0077 | BLUP                               |
| AX-111623534 | 6B | 433157274 | 0.0000166   | 0.0596 | 0.0077 | BLUP                               |
| AX-109983347 | 6B | 461592292 | 0.000017    | 0.0587 | 0.0077 | BLUP                               |
| AX-109084084 | 6B | 567656373 | 6.06897E-08 | 0.1261 | 0.0003 | BLUP, 07SX, 09SX, 08SX, 08SD, 09JS |
| AX-108965440 | 6B | 571046841 | 0.000017    | 0.0588 | 0.0077 | BLUP                               |
| AX-110559317 | 6B | 590758257 | 0.00000718  | 0.0639 | 0.0065 | BLUP                               |
| AX-110687567 | 6B | 707208262 | 0.0000128   | 0.0604 | 0.0077 | BLUP                               |
| AX-94546836  | 6D | 4410702   | 1.82149E-05 | 0.0492 | 0.0395 | 08SX                               |
| AX-94941823  | 6D | 5987200   | 0.0000156   | 0.0591 | 0.0077 | BLUP                               |
| AX-109399289 | 6D | 6831687   | 0.0000171   | 0.0588 | 0.0077 | BLUP                               |
| AX-111706410 | 6D | 7104958   | 0.0000104   | 0.0615 | 0.0075 | BLUP                               |
| AX-109897923 | 6D | 7291908   | 0.0000141   | 0.0597 | 0.0077 | BLUP                               |
| AX-111913895 | 6D | 47060228  | 0.0000189   | 0.0581 | 0.0079 | BLUP                               |
| AX-109088524 | 6D | 383981282 | 6.28111E-06 | 0.0650 | 0.0115 | BLUP, 07SX                         |
| AX-95256889  | 6D | 400546291 | 0.00000374  | 0.0670 | 0.0059 | BLUP                               |
| AX-111696257 | 6D | 431111546 | 0.0000173   | 0.0586 | 0.0077 | BLUP                               |
| AX-110190299 | 6D | 472984300 | 0.0000173   | 0.0586 | 0.0077 | BLUP                               |
| AX-110023271 | 7A | 114087145 | 1.63727E-06 | 0.0724 | 0.0075 | 09JS                               |
| AX-111064790 | 7A | 281664921 | 6.30568E-06 | 0.0675 | 0.0167 | BLUP, 07SX, 08SX                   |
| AX-110394064 | 7A | 284611580 | 0.0000143   | 0.0597 | 0.0077 | BLUP                               |
| AX-110382669 | 7A | 492086154 | 0.00000249  | 0.0702 | 0.0051 | BLUP                               |
| AX-108763286 | 7A | 528403659 | 7.16245E-06 | 0.0644 | 0.0703 | BLUP, 07SD                         |
| AX-110401938 | 7A | 610205797 | 0.0000181   | 0.0584 | 0.0077 | BLUP                               |
| AX-110412676 | 7A | 701813329 | 0.0000149   | 0.0596 | 0.0077 | BLUP                               |
| AX-110511347 | 7A | 704290704 | 0.00000914  | 0.0628 | 0.0073 | BLUP                               |
| AX-111147188 | 7B | 36333209  | 0.00000557  | 0.0648 | 0.0061 | BLUP                               |
| AX-111181637 | 7B | 48481023  | 1.75967E-05 | 0.0494 | 0.0395 | 08SX                               |
| AX-108776567 | 7B | 57935751  | 0.000000751 | 0.0769 | 0.0027 | BLUP                               |
| AX-109324588 | 7B | 344080087 | 0.0000104   | 0.0620 | 0.0075 | BLUP                               |
| AX-109306202 | 7B | 568676196 | 1.95613E-07 | 0.0843 | 0.0012 | BLUP, 07SX, 08SX, 09SX, 08SD       |
| AX-109347474 | 7B | 609141487 | 0.0000138   | 0.0613 | 0.0077 | BLUP                               |
| AX-89703681  | 7B | 639791862 | 5.61948E-06 | 0.0718 | 0.0177 | BLUP, 07SX, 08SD                   |
| AX-109974767 | 7B | 688599354 | 4.66145E-07 | 0.0809 | 0.0196 | BLUP, 07SD                         |
| AX-108865688 | 7B | 690239330 | 0.00000585  | 0.0648 | 0.0061 | BLUP                               |
| AX-86178207  | 7B | 706808987 | 1.49645E-06 | 0.0620 | 0.0191 | 08HB                               |
| AX-95684576  | 7B | 706861473 | 0.000000926 | 0.0755 | 0.0028 | BLUP                               |

|    |              |    |           |             |        |        |                                                                                                |
|----|--------------|----|-----------|-------------|--------|--------|------------------------------------------------------------------------------------------------|
|    | AX-110476719 | 7B | 712889242 | 0.00000264  | 0.0693 | 0.0051 | BLUP                                                                                           |
|    | AX-108746141 | 7B | 718332571 | 0.0000093   | 0.0632 | 0.0073 | BLUP                                                                                           |
|    | AX-110581635 | 7B | 720497627 | 1.54298E-05 | 0.0497 | 0.0836 | 08HB                                                                                           |
|    | AX-110595065 | 7B | 723154830 | 0.0000111   | 0.0613 | 0.0077 | BLUP                                                                                           |
|    | AX-108911221 | 7D | 4991311   | 5.73739E-09 | 0.0969 | 0.0001 | 09JS                                                                                           |
|    | AX-110541194 | 7D | 337568893 | 0.0000029   | 0.0685 | 0.0052 | BLUP                                                                                           |
|    | AX-111503444 | 7D | 393285287 | 5.71225E-06 | 0.0680 | 0.0419 | 09JS, 08HB                                                                                     |
|    | AX-110913995 | 7D | 428054733 | 1.47942E-05 | 0.0596 | 0.0309 | BLUP, 07SX, 08SX, 09SX                                                                         |
|    | AX-110967909 | 7D | 449077527 | 5.70758E-08 | 0.0987 | 0.0004 | BLUP, 07SX, 08SX, 09SX, 08SD                                                                   |
|    | AX-108838800 | 7D | 524655072 | 1.53183E-05 | 0.0602 | 0.0551 | 09JS                                                                                           |
|    | AX-111802901 | 7D | 549281817 | 2.56081E-08 | 0.1374 | 0.0002 | BLUP, 07SX, 08SX, 09SX, 08SD, 09JS                                                             |
|    | AX-110446329 | 7D | 554832615 | 9.08021E-07 | 0.0653 | 0.0035 | BLUP, 07SX, 08SX, 09SX, 08SD                                                                   |
|    | AX-110016687 | 7D | 563051214 | 8.28845E-06 | 0.0636 | 0.0321 | 09JS                                                                                           |
|    | AX-109835957 | 7D | 632128283 | 6.41522E-06 | 0.0664 | 0.0809 | 08JS                                                                                           |
| PH | AX-108800518 | 1A | 54587011  | 9.76705E-07 | 0.0765 | 0.0123 | 07SD                                                                                           |
|    | AX-108912867 | 1A | 474384177 | 2.23931E-06 | 0.0715 | 0.0170 | 07SD                                                                                           |
|    | AX-111531574 | 1B | 554497309 | 5.78625E-06 | 0.0698 | 0.0275 | BLUP, 09HB, 07SD                                                                               |
|    | AX-111525866 | 1D | 263206152 | 5.50955E-06 | 0.0686 | 0.0346 | BLUP, 07SX, 08SX, 09SX, 07SC                                                                   |
|    | AX-89612565  | 1D | 320382523 | 1.81359E-05 | 0.0589 | 0.0852 | 08SX                                                                                           |
|    | AX-111667781 | 2B | 50354330  | 2.34858E-06 | 0.0726 | 0.0198 | 08SC                                                                                           |
|    | AX-110452530 | 2B | 433964309 | 1.19616E-05 | 0.0617 | 0.0465 | 07SD                                                                                           |
|    | AX-111132985 | 2D | 8670932   | 1.30192E-06 | 0.0775 | 0.0113 | BLUP, 08SC                                                                                     |
|    | AX-110621158 | 2D | 16015354  | 8.55415E-08 | 0.0911 | 0.0014 | 08SC                                                                                           |
|    | AX-111498546 | 3A | 624694401 | 5.83486E-06 | 0.0742 | 0.0466 | BLUP, 07SX, 07JS, 07HB                                                                         |
|    | AX-111577792 | 3A | 714283618 | 1.01053E-05 | 0.0630 | 0.0849 | 09SX, 09JS                                                                                     |
|    | AX-110177992 | 3A | 723214155 | 6.66567E-06 | 0.0650 | 0.0517 | BLUP, 07HB, 07SX, 07JS                                                                         |
|    | AX-109401854 | 3B | 80092394  | 3.92364E-06 | 0.0682 | 0.0219 | 07SD                                                                                           |
|    | AX-109456365 | 3B | 325678290 | 1.42689E-05 | 0.0607 | 0.1441 | 09SC                                                                                           |
|    | AX-109471812 | 3B | 827132879 | 2.31018E-07 | 0.0842 | 0.0058 | 07SD                                                                                           |
|    | AX-109272207 | 4A | 133050366 | 1.07275E-05 | 0.0522 | 0.0711 | BLUP, 07JS, 07HB                                                                               |
|    | AX-109973724 | 4A | 247148243 | 8.70009E-06 | 0.0527 | 0.0548 | 08SX                                                                                           |
|    | AX-111600193 | 4A | 642368219 | 8.63821E-07 | 0.0850 | 0.0325 | BLUP, 07HB, 09HB, 07SD, 08SD,<br>09SD, 07SC, 08SC, 09SC, 07JS, 08JS,<br>09JS, 07SX, 08SX, 09SX |
|    | AX-108745433 | 4A | 703576045 | 1.25184E-05 | 0.0609 | 0.0800 | BLUP, 08SX, 09HB                                                                               |
|    | AX-111651544 | 4B | 427276284 | 1.90933E-05 | 0.0590 | 0.0802 | 08SC                                                                                           |
|    | AX-109404379 | 4B | 546372605 | 1.17671E-05 | 0.0624 | 0.0465 | 07SD                                                                                           |
|    | AX-169336388 | 4D | 19        | 1.74561E-05 | 0.0594 | 0.0802 | 08SC                                                                                           |
|    | AX-108890219 | 4D | 486       | 5.85476E-06 | 0.0677 | 0.0740 | 09JS, 08SC, 07SX, 09SC, 08SD                                                                   |
|    | AX-109940654 | 5A | 568661654 | 4.58053E-06 | 0.0692 | 0.0231 | 07SD                                                                                           |
|    | AX-109860828 | 5B | 422030835 | 3.24932E-06 | 0.0748 | 0.0422 | BLUP, 07HB, 08HB, 09HB, 07SD,<br>07SX, 08SX, 09SX, 07JS, 08JS                                  |
|    | AX-95152512  | 5D | 14390791  | 4.43595E-06 | 0.0744 | 0.0395 | BLUP, 09HB, 08SX, 09SX, 09SD,<br>07SD, 08SC, 07HB, 07SX, 07JS, 08JS                            |

|              |    |           |             |        |        |                                                               |
|--------------|----|-----------|-------------|--------|--------|---------------------------------------------------------------|
| AX-109809706 | 5D | 476819411 | 1.15292E-05 | 0.0631 | 0.1159 | 09JS                                                          |
| AX-108898503 | 5D | 554823716 | 7.32574E-06 | 0.0652 | 0.0923 | 09JS                                                          |
| AX-86180093  | 5D | 560329049 | 1.76403E-05 | 0.0593 | 0.0802 | 08SC                                                          |
| AX-111554374 | 6A | 84033013  | 2.78666E-06 | 0.0753 | 0.0370 | BLUP, 07HB, 07SD, 07SX, 09SX,<br>08HB, 09HB, 08JS             |
| AX-109337275 | 6B | 400888529 | 5.12739E-06 | 0.0709 | 0.0294 | 08SC                                                          |
| AX-109084084 | 6B | 567656373 | 1.98554E-06 | 0.0759 | 0.0167 | 08SX                                                          |
| AX-110367735 | 6D | 68132618  | 1.69209E-05 | 0.0599 | 0.0608 | 07SD                                                          |
| AX-110038044 | 7A | 484716540 | 1.8552E-06  | 0.0733 | 0.0312 | 09JS                                                          |
| AX-109469020 | 7A | 637965507 | 3.22406E-06 | 0.0716 | 0.0232 | 08SC                                                          |
| AX-109429982 | 7B | 660663186 | 5.17576E-06 | 0.0733 | 0.0515 | BLUP, 07HB, 09HB, 08SX, 07SD,<br>07SX, 08HB, 09SX, 07JS, 08SD |
| AX-111568844 | 7B | 505447589 | 6.36228E-06 | 0.0788 | 0.0258 | BLUP, 08SC                                                    |
| AX-111058442 | 7D | 58203663  | 7.19824E-06 | 0.0645 | 0.1323 | 09SC                                                          |
| AX-108748467 | 7D | 263881844 | 1.86179E-05 | 0.0596 | 0.0852 | 08SX                                                          |
| AX-109526545 | 7D | 397577441 | 1.02405E-05 | 0.0628 | 0.0577 | BLUP, 07HB, 07SX, 07JS                                        |
| AX-109391680 | 7D | 469085796 | 1.85023E-05 | 0.0487 | 0.0852 | 08SX                                                          |
| AX-111157930 | 7D | 513389248 | 1.97034E-05 | 0.0590 | 0.0662 | 07SD                                                          |
| AX-110396689 | 7D | 610620986 | 1.19936E-05 | 0.0631 | 0.1441 | 09SC                                                          |

SL, spike length; TKW, 1000-kernel weight; KNS, kernel number per spike; TSNS, total spikelet number per spike; FSNS, fertile spikelet number per spike; GWS, grain weight per spike; PH, plant height; SNPP, spike number per plant; SX, HB, SD, SC and JS refer to Shaanxi, Hebei, Shandong, Sichuan and Jiangsu locations, respectively. 07, 08 and 09 refer to 2007, 2008 and 2009 year, respectively

**TABLE S6** Distribution of the significant SNPs for eight agronomic traits on 21 wheat chromosomes.

| Chr | PH | SL | TSNS | FSNS | KNS | TKW | SNPP | GWS |
|-----|----|----|------|------|-----|-----|------|-----|
| 1A  | 2  | 5  | 4    | 1    | 2   |     | 9    | 2   |
| 1B  | 1  | 5  | 3    | 2    | 2   |     | 7    | 2   |
| 1D  | 2  | 5  | 6    | 1    | 2   | 1   | 7    | 4   |
| 2A  |    | 3  | 3    | 3    | 2   | 1   | 3    | 5   |
| 2B  | 2  | 5  | 5    | 1    | 2   |     | 8    | 2   |
| 2D  | 2  | 5  | 7    |      | 4   |     | 8    | 2   |
| 3A  | 3  | 6  | 9    |      | 1   |     | 9    | 4   |
| 3B  | 3  | 3  | 1    |      | 2   |     | 8    | 6   |
| 3D  |    | 4  |      | 1    |     | 1   | 6    |     |
| 4A  | 4  | 6  | 6    | 1    |     | 1   | 6    | 4   |
| 4B  | 2  | 4  | 3    | 1    | 1   |     | 6    | 4   |
| 4D  | 2  | 3  | 5    | 1    |     | 1   | 1    | 2   |
| 5A  | 1  | 4  | 5    | 1    | 2   |     | 4    | 4   |
| 5B  | 1  | 6  | 5    | 3    |     | 1   | 9    | 7   |
| 5D  | 4  | 6  | 6    | 6    | 1   | 1   | 8    | 5   |
| 6A  | 1  | 4  | 2    | 2    | 4   | 1   | 6    | 3   |
| 6B  | 2  | 4  | 4    | 3    | 5   |     | 9    | 3   |

|       |    |     |     |    |    |    |     |    |
|-------|----|-----|-----|----|----|----|-----|----|
| 6D    | 1  | 1   | 3   | 3  |    |    | 10  | 3  |
| 7A    | 2  | 6   | 5   | 3  | 2  | 1  | 8   | 6  |
| 7B    | 2  | 4   | 3   | 3  |    | 1  | 15  | 4  |
| 7D    | 6  | 20  | 22  | 5  | 2  | 3  | 10  | 9  |
| Total | 43 | 109 | 107 | 41 | 34 | 13 | 157 | 81 |

---

SL, spike length; TKW, 1000-kernel weight; KNS, kernel number per spike; TSNS, total spikelet number per spike; FSNS, fertile spikelet number per spike; GWS, grain weight per spike; PH, plant height; SNPP, spike number per plant



**TABLE S7** Comparison of phenotypes in 15 environments between cultivars containing superior alleles and cultivars containing inferior alleles at 31 loci. Superior alleles are showed in red.

| Trait | Chr | SNP          | Allele | 2007    |         |        |          |         | 2008    |         |        |          |         | 2009    |         |        |          |         |
|-------|-----|--------------|--------|---------|---------|--------|----------|---------|---------|---------|--------|----------|---------|---------|---------|--------|----------|---------|
|       |     |              |        | Shaanxi | Jiangsu | Hebei  | Shandong | Sichuan | Shaanxi | Jiangsu | Hebei  | Shandong | Sichuan | Shaanxi | Jiangsu | Hebei  | Shandong | Sichuan |
| TKW   | 4A  | AX-111600193 | A/A    | 38.589  | 39.756  | 40.545 | 36.251   | 39.624  | 42.518  | 37.775  | 37.866 | 38.289   | 40.490  | 38.942  | 37.102  | 35.972 | 39.883   | 39.855  |
|       |     |              | G/G    | 36.628  | 38.186  | 39.168 | 34.331   | 37.500  | 40.471  | 36.166  | 36.179 | 35.172   | 38.722  | 38.104  | 34.804  | 34.439 | 39.428   | 35.420  |
|       |     |              | P      | 0.003   | 0.036   | 0.054  | 0.012    | 0.019   | 0.003   | 0.033   | 0.019  | 0.001    | 0.010   | 0.112   | 0.001   | 0.012  | 0.271    | 0.000   |
|       | 5B  | AX-109860828 | A/A    | 38.378  | 39.862  | 40.576 | 36.107   | 39.732  | 42.580  | 37.611  | 37.648 | 38.197   | 40.678  | 38.791  | 37.153  | 35.985 | 39.750   | 39.779  |
|       |     |              | G/G    | 37.546  | 37.954  | 39.417 | 35.544   | 37.011  | 40.817  | 36.868  | 36.863 | 36.248   | 37.910  | 38.597  | 35.136  | 34.513 | 39.641   | 36.814  |
|       |     |              | P      | 0.082   | 0.004   | 0.051  | 0.205    | 0.001   | 0.002   | 0.155   | 0.125  | 0.007    | 0.000   | 0.366   | 0.000   | 0.005  | 0.430    | 0.001   |
|       | 7D  | AX-108838800 | A/A    | 38.271  | 39.786  | 40.383 | 36.201   | 39.909  | 42.395  | 37.882  | 37.703 | 38.328   | 40.537  | 38.739  | 37.019  | 35.824 | 39.840   | 39.943  |
|       |     |              | C/C    | 37.433  | 37.664  | 39.270 | 35.453   | 35.875  | 40.684  | 35.144  | 36.276 | 35.759   | 37.998  | 38.230  | 34.972  | 34.616 | 39.498   | 35.509  |
|       |     |              | P      | 0.078   | 0.002   | 0.057  | 0.142    | 0.000   | 0.003   | 0.000   | 0.018  | 0.001    | 0.000   | 0.186   | 0.000   | 0.015  | 0.293    | 0.000   |
| KNS   | 2D  | AX-110982403 | G/G    | 50.938  | 49.507  | 54.650 | 46.007   | 44.147  | 50.300  | 49.185  | 48.653 | 39.718   | 31.510  | 50.518  | 47.585  | 51.359 | 41.166   | 33.319  |
|       |     |              | T/T    | 53.278  | 55.361  | 59.931 | 50.979   | 49.257  | 53.051  | 55.195  | 53.000 | 42.873   | 35.282  | 52.658  | 54.816  | 55.669 | 43.941   | 36.515  |
|       |     |              | P      | 0.001   | 0.000   | 0.000  | 0.000    | 0.000   | 0.000   | 0.000   | 0.000  | 0.000    | 0.000   | 0.000   | 0.004   | 0.000  | 0.000    | 0.000   |
| TSNS  | 1B  | AX-108928321 | A/A    | 19.546  | 22.480  | 21.160 | 19.208   | —       | 20.242  | 21.671  | 19.674 | 18.672   | 21.087  | 15.940  | 21.375  | 19.745 | 19.426   | 21.471  |
|       |     |              | G/G    | 18.795  | 21.614  | 20.473 | 18.489   | —       | 19.430  | 20.805  | 19.371 | 18.370   | 20.322  | 15.583  | 20.798  | 19.197 | 18.873   | 20.961  |
|       |     |              | P      | 0.000   | 0.000   | 0.000  | 0.000    | —       | 0.000   | 0.000   | 0.078  | 0.004    | 0.000   | 0.100   | 0.000   | 0.000  | 0.000    | 0.000   |
|       | 1D  | AX-110627624 | C/C    | 19.005  | 21.643  | 20.535 | 18.644   | —       | 19.488  | 21.001  | 19.433 | 18.270   | 20.524  | 15.629  | 20.790  | 19.314 | 18.850   | 21.079  |
|       |     |              | T/T    | 19.281  | 22.625  | 21.254 | 19.073   | —       | 20.251  | 21.525  | 19.591 | 18.912   | 20.862  | 15.919  | 21.529  | 19.589 | 19.471   | 21.326  |
|       |     |              | P      | 0.056   | 0.000   | 0.000  | 0.011    | —       | 0.000   | 0.001   | 0.233  | 0.000    | 0.026   | 0.157   | 0.000   | 0.049  | 0.000    | 0.087   |
|       | 2D  | AX-109508682 | A/A    | 18.793  | 21.576  | 20.360 | 18.425   | —       | 19.434  | 20.938  | 19.042 | 18.338   | 20.455  | 15.122  | 20.734  | 19.192 | 18.615   | 21.113  |
|       |     |              | G/G    | 19.221  | 22.103  | 20.915 | 18.975   | —       | 19.900  | 21.205  | 19.675 | 18.536   | 20.680  | 15.906  | 21.137  | 19.472 | 19.270   | 21.151  |
|       |     |              | P      | 0.007   | 0.002   | 0.005  | 0.002    | —       | 0.008   | 0.063   | 0.002  | 0.052    | 0.099   | 0.003   | 0.005   | 0.047  | 0.000    | 0.419   |
|       | 3A  | AX-110589268 | A/A    | 19.062  | 21.789  | 20.762 | 18.575   | —       | 19.563  | 21.048  | 19.211 | 18.396   | 20.546  | 15.372  | 20.916  | 19.267 | 18.981   | 21.042  |
|       |     |              | C/C    | 19.193  | 22.158  | 20.801 | 19.056   | —       | 20.004  | 21.346  | 19.774 | 18.661   | 20.759  | 16.320  | 21.149  | 19.658 | 19.268   | 21.375  |
|       |     |              | P      | 0.221   | 0.024   | 0.426  | 0.005    | —       | 0.009   | 0.042   | 0.004  | 0.012    | 0.105   | 0.000   | 0.069   | 0.009  | 0.030    | 0.025   |

|     |              |              |        |        |        |        |       |        |        |        |        |        |        |        |        |        |        |       |
|-----|--------------|--------------|--------|--------|--------|--------|-------|--------|--------|--------|--------|--------|--------|--------|--------|--------|--------|-------|
| 4D  | AX-169337600 | A/A          | 18.940 | 21.569 | 20.425 | 18.494 | —     | 19.381 | 21.004 | 19.183 | 18.227 | 20.622 | 15.089 | 20.651 | 19.310 | 18.686 | 21.090 |       |
|     |              | G/G          | 19.207 | 22.163 | 20.934 | 18.916 | —     | 19.980 | 21.217 | 19.619 | 18.640 | 20.645 | 15.935 | 21.218 | 19.464 | 19.327 | 21.182 |       |
|     |              | P            | 0.069  | 0.001  | 0.009  | 0.014  | —     | 0.001  | 0.122  | 0.028  | 0.000  | 0.449  | 0.002  | 0.000  | 0.189  | 0.000  | 0.312  |       |
| 5A  | AX-108844453 | A/A          | 19.354 | 22.333 | 21.006 | 19.042 | —     | 20.175 | 21.283 | 19.668 | 18.617 | 20.754 | 15.992 | 21.248 | 19.523 | 19.404 | 21.310 |       |
|     |              | C/C          | 18.878 | 21.619 | 20.557 | 18.487 | —     | 19.324 | 21.072 | 19.284 | 18.361 | 20.515 | 15.505 | 20.817 | 19.346 | 18.800 | 21.018 |       |
|     |              | P            | 0.002  | 0.000  | 0.014  | 0.001  | —     | 0.000  | 0.105  | 0.034  | 0.013  | 0.076  | 0.037  | 0.003  | 0.136  | 0.000  | 0.040  |       |
| 5B  | AX-111541781 | A/A          | 19.446 | 22.364 | 21.027 | 19.018 | —     | 20.124 | 21.418 | 19.579 | 18.618 | 20.885 | 15.734 | 21.305 | 19.512 | 19.313 | 21.311 |       |
|     |              | G/G          | 18.810 | 21.596 | 20.500 | 18.522 | —     | 19.441 | 20.944 | 19.336 | 18.383 | 20.385 | 15.690 | 20.784 | 19.283 | 18.890 | 20.989 |       |
|     |              | P            | 0.000  | 0.000  | 0.005  | 0.003  | —     | 0.000  | 0.003  | 0.131  | 0.021  | 0.001  | 0.438  | 0.000  | 0.079  | 0.003  | 0.033  |       |
| 7B  | AX-111082615 | A/A          | 19.241 | 22.119 | 21.044 | 18.782 | —     | 19.783 | 21.414 | 19.798 | 18.592 | 20.889 | 15.629 | 21.187 | 19.598 | 19.119 | 21.313 |       |
|     |              | T/T          | 18.910 | 21.779 | 20.437 | 18.757 | —     | 19.776 | 20.877 | 19.096 | 18.406 | 20.316 | 15.807 | 20.854 | 19.186 | 19.071 | 20.947 |       |
|     |              | P            | 0.023  | 0.030  | 0.001  | 0.445  | —     | 0.484  | 0.001  | 0.000  | 0.053  | 0.000  | 0.256  | 0.015  | 0.005  | 0.375  | 0.017  |       |
| 7D  | AX-110967909 | C/C          | 18.795 | 21.577 | 20.581 | 18.422 | —     | 19.157 | 21.015 | 19.253 | 18.366 | 20.407 | 15.546 | 20.808 | 19.379 | 18.794 | 21.008 |       |
|     |              | T/T          | 19.324 | 22.261 | 20.935 | 19.030 | —     | 20.142 | 21.302 | 19.617 | 18.583 | 20.818 | 15.813 | 21.226 | 19.480 | 19.336 | 21.242 |       |
|     |              | P            | 0.001  | 0.000  | 0.045  | 0.000  | —     | 0.000  | 0.047  | 0.048  | 0.036  | 0.007  | 0.175  | 0.004  | 0.271  | 0.000  | 0.090  |       |
| GWS | 3B           | AX-110142073 | C/C    | 2.007  | 2.298  | 2.374  | 1.767 | 1.904  | 2.217  | 2.347  | 1.931  | 1.553  | 1.377  | 2.059  | 1.896  | 1.956  | 1.719  | 1.417 |
|     |              |              | G/G    | 1.936  | 2.258  | 2.191  | 1.674 | 1.746  | 2.098  | 2.235  | 1.828  | 1.537  | 1.268  | 1.904  | 1.816  | 1.809  | 1.639  | 1.279 |
|     |              |              | P      | 0.023  | 0.225  | 0.001  | 0.013 | 0.009  | 0.000  | 0.011  | 0.008  | 0.329  | 0.000  | 0.000  | 0.037  | 0.000  | 0.004  | 0.000 |
| 4A  | AX-110630537 | C/C          | 1.929  | 2.209  | 2.184  | 1.670  | 1.763 | 2.092  | 2.224  | 1.820  | 1.504  | 1.267  | 1.933  | 1.795  | 1.819  | 1.637  | 1.274  |       |
|     |              | T/T          | 2.091  | 2.475  | 2.545  | 1.865  | 1.998 | 2.344  | 2.497  | 2.059  | 1.677  | 1.497  | 2.131  | 1.987  | 2.049  | 1.806  | 1.554  |       |
|     |              | P            | 0.000  | 0.000  | 0.000  | 0.000  | 0.001 | 0.000  | 0.000  | 0.000  | 0.000  | 0.000  | 0.000  | 0.000  | 0.000  | 0.000  | 0.000  |       |
| 4A  | AX-111600193 | A/A          | 2.009  | 2.297  | 2.324  | 1.764  | 1.849 | 2.190  | 2.313  | 1.917  | 1.586  | 1.357  | 2.009  | 1.901  | 1.909  | 1.698  | 1.386  |       |
|     |              | G/G          | 1.850  | 2.250  | 2.141  | 1.573  | 1.750 | 2.066  | 2.281  | 1.787  | 1.397  | 1.249  | 1.944  | 1.664  | 1.791  | 1.630  | 1.215  |       |
|     |              | P            | 0.000  | 0.258  | 0.010  | 0.001  | 0.143 | 0.006  | 0.322  | 0.014  | 0.000  | 0.007  | 0.111  | 0.000  | 0.012  | 0.053  | 0.001  |       |
| 5A  | AX-110913131 | C/C          | 1.892  | 2.162  | 2.127  | 1.607  | 1.674 | 2.058  | 2.143  | 1.741  | 1.458  | 1.204  | 1.905  | 1.691  | 1.796  | 1.614  | 1.242  |       |
|     |              | T/T          | 2.031  | 2.356  | 2.386  | 1.813  | 1.923 | 2.226  | 2.391  | 1.978  | 1.602  | 1.403  | 2.035  | 1.972  | 1.943  | 1.726  | 1.422  |       |
|     |              | P            | 0.000  | 0.000  | 0.000  | 0.000  | 0.000 | 0.000  | 0.000  | 0.000  | 0.000  | 0.000  | 0.000  | 0.000  | 0.000  | 0.000  | 0.000  |       |
| 5A  | AX-110033504 | C/C          | 2.033  | 2.403  | 2.393  | 1.799  | 1.932 | 2.260  | 2.420  | 2.012  | 1.639  | 1.420  | 2.048  | 1.966  | 1.979  | 1.747  | 1.465  |       |
|     |              | T/T          | 1.918  | 2.168  | 2.181  | 1.662  | 1.713 | 2.070  | 2.190  | 1.781  | 1.471  | 1.244  | 1.930  | 1.755  | 1.803  | 1.621  | 1.248  |       |

|    |              |              |       |        |         |        |        |         |        |         |        |        |        |        |         |        |        |         |
|----|--------------|--------------|-------|--------|---------|--------|--------|---------|--------|---------|--------|--------|--------|--------|---------|--------|--------|---------|
|    |              | P            | 0.000 | 0.000  | 0.000   | 0.000  | 0.000  | 0.000   | 0.000  | 0.000   | 0.000  | 0.000  | 0.001  | 0.000  | 0.000   | 0.000  | 0.000  |         |
| 5B | AX-110586945 | C/C          | 2.030 | 2.387  | 2.458   | 1.770  | 1.902  | 2.275   | 2.452  | 1.961   | 1.626  | 1.421  | 2.061  | 1.912  | 1.989   | 1.740  | 1.457  |         |
|    |              | T/T          | 1.937 | 2.208  | 2.169   | 1.693  | 1.756  | 2.089   | 2.195  | 1.841   | 1.503  | 1.270  | 1.937  | 1.803  | 1.813   | 1.639  | 1.275  |         |
|    |              | P            | 0.005 | 0.000  | 0.000   | 0.036  | 0.016  | 0.000   | 0.000  | 0.003   | 0.000  | 0.000  | 0.001  | 0.009  | 0.000   | 0.001  | 0.000  |         |
| 5D | AX-95152512  | C/C          | 1.985 | 2.308  | 2.292   | 1.750  | 1.837  | 2.176   | 2.311  | 1.900   | 1.560  | 1.337  | 2.000  | 1.878  | 1.899   | 1.694  | 1.362  |         |
|    |              | G/G          | 1.886 | 2.042  | 2.193   | 1.532  | 1.605  | 2.031   | 2.120  | 1.719   | 1.456  | 1.245  | 1.874  | 1.574  | 1.710   | 1.518  | 1.167  |         |
|    |              | P            | 0.054 | 0.002  | 0.157   | 0.001  | 0.024  | 0.009   | 0.013  | 0.008   | 0.049  | 0.052  | 0.029  | 0.000  | 0.002   | 0.000  | 0.001  |         |
| 6B | AX-109084084 | A/A          | 1.854 | 2.046  | 2.118   | 1.624  | 1.661  | 1.988   | 2.096  | 1.673   | 1.408  | 1.167  | 1.881  | 1.617  | 1.742   | 1.561  | 1.182  |         |
|    |              | G/G          | 2.006 | 2.347  | 2.328   | 1.752  | 1.869  | 2.206   | 2.350  | 1.938   | 1.585  | 1.373  | 2.013  | 1.914  | 1.916   | 1.712  | 1.400  |         |
|    |              | P            | 0.000 | 0.000  | 0.001   | 0.005  | 0.004  | 0.000   | 0.000  | 0.000   | 0.000  | 0.000  | 0.002  | 0.000  | 0.000   | 0.000  | 0.000  |         |
| 6D | AX-95009966  | C/C          | 2.011 | 2.313  | 2.334   | 1.743  | 1.890  | 2.209   | 2.313  | 1.890   | 1.568  | 1.354  | 2.027  | 1.919  | 1.918   | 1.712  | 1.388  |         |
|    |              | T/T          | 1.931 | 2.248  | 2.232   | 1.698  | 1.745  | 2.102   | 2.287  | 1.870   | 1.523  | 1.287  | 1.924  | 1.767  | 1.837   | 1.640  | 1.298  |         |
|    |              | P            | 0.012 | 0.110  | 0.035   | 0.145  | 0.015  | 0.001   | 0.296  | 0.328   | 0.104  | 0.018  | 0.003  | 0.000  | 0.014   | 0.010  | 0.010  |         |
| 7B | AX-89703681  | C/C          | 1.858 | 2.200  | 2.100   | 1.698  | 1.674  | 2.005   | 2.180  | 1.718   | 1.466  | 1.228  | 1.795  | 1.728  | 1.780   | 1.541  | 1.229  |         |
|    |              | T/T          | 1.996 | 2.305  | 2.319   | 1.735  | 1.847  | 2.191   | 2.326  | 1.911   | 1.564  | 1.347  | 2.019  | 1.879  | 1.907   | 1.707  | 1.373  |         |
|    |              | P            | 0.003 | 0.076  | 0.003   | 0.261  | 0.029  | 0.000   | 0.014  | 0.001   | 0.027  | 0.004  | 0.000  | 0.008  | 0.007   | 0.000  | 0.003  |         |
| 7B | AX-109306202 | C/C          | 1.860 | 2.224  | 2.129   | 1.636  | 1.676  | 2.044   | 2.205  | 1.773   | 1.520  | 1.231  | 1.883  | 1.743  | 1.756   | 1.614  | 1.224  |         |
|    |              | G/G          | 2.014 | 2.309  | 2.334   | 1.761  | 1.876  | 2.202   | 2.335  | 1.928   | 1.555  | 1.365  | 2.026  | 1.888  | 1.924   | 1.703  | 1.390  |         |
|    |              | P            | 0.000 | 0.073  | 0.000   | 0.004  | 0.003  | 0.000   | 0.007  | 0.000   | 0.194  | 0.000  | 0.000  | 0.002  | 0.000   | 0.004  | 0.000  |         |
| 7D | AX-110913995 | C/C          | 1.842 | 2.129  | 2.122   | 1.585  | 1.627  | 1.998   | 2.151  | 1.726   | 1.430  | 1.186  | 1.841  | 1.660  | 1.751   | 1.585  | 1.193  |         |
|    |              | T/T          | 2.073 | 2.402  | 2.421   | 1.839  | 1.975  | 2.285   | 2.417  | 1.999   | 1.632  | 1.438  | 2.090  | 2.006  | 1.984   | 1.749  | 1.460  |         |
|    |              | P            | 0.000 | 0.000  | 0.000   | 0.000  | 0.000  | 0.000   | 0.000  | 0.000   | 0.000  | 0.000  | 0.000  | 0.000  | 0.000   | 0.000  | 0.000  |         |
| 7D | AX-110446329 | C/C          | 1.991 | 2.382  | 2.324   | 1.768  | 1.858  | 2.228   | 2.356  | 1.945   | 1.603  | 1.367  | 2.019  | 1.939  | 1.929   | 1.714  | 1.390  |         |
|    |              | T/T          | 1.970 | 2.224  | 2.270   | 1.695  | 1.799  | 2.128   | 2.259  | 1.845   | 1.506  | 1.304  | 1.970  | 1.803  | 1.861   | 1.657  | 1.319  |         |
|    |              | P            | 0.284 | 0.001  | 0.175   | 0.042  | 0.188  | 0.002   | 0.024  | 0.011   | 0.004  | 0.028  | 0.106  | 0.001  | 0.036   | 0.033  | 0.033  |         |
| 7D | AX-110967909 | C/C          | 1.814 | 2.117  | 2.090   | 1.577  | 1.657  | 1.974   | 2.144  | 1.696   | 1.425  | 1.188  | 1.810  | 1.645  | 1.730   | 1.572  | 1.189  |         |
|    |              | T/T          | 2.070 | 2.398  | 2.406   | 1.819  | 1.936  | 2.275   | 2.398  | 1.995   | 1.632  | 1.416  | 2.091  | 1.989  | 1.981   | 1.754  | 1.453  |         |
|    |              | P            | 0.000 | 0.000  | 0.000   | 0.000  | 0.000  | 0.000   | 0.000  | 0.000   | 0.000  | 0.000  | 0.000  | 0.000  | 0.000   | 0.000  | 0.000  |         |
| PH | 1B           | AX-111531574 | G/G   | 98.367 | 104.006 | 94.253 | 93.722 | 108.596 | 95.991 | 102.852 | 86.582 | 95.306 | 99.656 | 90.767 | 105.613 | 86.546 | 97.814 | 103.391 |

|      |              |              |         |         |         |         |         |         |         |        |         |         |         |         |         |         |         |   |
|------|--------------|--------------|---------|---------|---------|---------|---------|---------|---------|--------|---------|---------|---------|---------|---------|---------|---------|---|
|      |              | T/T          | 104.920 | 108.562 | 100.304 | 98.544  | 114.920 | 101.334 | 105.850 | 91.798 | 100.235 | 102.766 | 95.254  | 107.898 | 91.397  | 105.806 | 108.090 |   |
|      |              | P            | 0.003   | 0.015   | 0.005   | 0.007   | 0.002   | 0.005   | 0.047   | 0.007  | 0.007   | 0.069   | 0.003   | 0.128   | 0.005   | 0.000   | 0.021   |   |
| 2D   | AX-111132985 | A/A          | 101.417 | 106.187 | 96.824  | 95.229  | 112.007 | 98.665  | 104.341 | 88.899 | 97.726  | 100.466 | 93.145  | 106.247 | 88.573  | 101.507 | 105.400 |   |
|      |              | C/C          | 107.012 | 109.324 | 102.523 | 103.673 | 115.692 | 102.185 | 105.824 | 94.087 | 100.729 | 104.905 | 95.644  | 108.709 | 94.057  | 109.979 | 109.836 |   |
|      |              | P            | 0.018   | 0.096   | 0.017   | 0.000   | 0.074   | 0.069   | 0.235   | 0.016  | 0.095   | 0.031   | 0.093   | 0.142   | 0.005   | 0.001   | 0.047   |   |
| 4A   | AX-109272207 | C/C          | 108.347 | 112.113 | 103.820 | 101.181 | 118.615 | 104.354 | 108.793 | 94.826 | 102.790 | 106.463 | 98.139  | 110.556 | 94.663  | 108.737 | 111.396 |   |
|      |              | T/T          | 99.332  | 103.700 | 94.681  | 94.321  | 109.276 | 96.325  | 102.181 | 87.193 | 95.827  | 98.563  | 91.073  | 104.808 | 86.626  | 99.919  | 103.066 |   |
|      |              | P            | 0.000   | 0.000   | 0.000   | 0.000   | 0.000   | 0.000   | 0.000   | 0.000  | 0.000   | 0.000   | 0.000   | 0.001   | 0.000   | 0.000   | 0.000   |   |
| 4A   | AX-108745433 | A/A          | 106.408 | 109.559 | 101.937 | 101.003 | 115.096 | 101.952 | 106.737 | 93.644 | 100.449 | 103.202 | 95.980  | 109.100 | 93.153  | 107.249 | 109.329 |   |
|      |              | G/G          | 99.745  | 104.746 | 94.874  | 93.333  | 111.446 | 97.590  | 103.282 | 86.687 | 96.682  | 99.929  | 92.212  | 104.726 | 86.651  | 99.703  | 103.760 |   |
|      |              | P            | 0.001   | 0.005   | 0.000   | 0.000   | 0.034   | 0.009   | 0.014   | 0.000  | 0.017   | 0.036   | 0.005   | 0.006   | 0.000   | 0.000   | 0.003   |   |
| 4A   | AX-111600193 | A/A          | 99.689  | 104.643 | 94.939  | 94.577  | 110.517 | 96.863  | 102.642 | 87.507 | 96.346  | 99.293  | 91.603  | 105.145 | 87.200  | 100.113 | 103.704 |   |
|      |              | G/G          | 114.287 | 115.059 | 109.906 | 105.549 | 121.679 | 109.840 | 113.073 | 99.960 | 107.120 | 110.239 | 102.080 | 113.214 | 99.693  | 115.143 | 116.174 |   |
|      |              | P            | 0.000   | 0.000   | 0.000   | 0.000   | 0.000   | 0.000   | 0.000   | 0.000  | 0.000   | 0.000   | 0.000   | 0.001   | 0.000   | 0.000   | 0.000   |   |
| 5B   | AX-109860828 | A/A          | 98.468  | 104.013 | 94.266  | 93.196  | 110.022 | 96.344  | 102.554 | 86.825 | 95.521  | 98.977  | 91.169  | 104.510 | 86.676  | 98.603  | 103.186 |   |
|      |              | G/G          | 115.439 | 115.745 | 109.868 | 108.043 | 120.575 | 109.152 | 111.213 | 99.475 | 107.260 | 109.537 | 101.699 | 114.167 | 99.075  | 117.460 | 116.507 |   |
|      |              | P            | 0.000   | 0.000   | 0.000   | 0.000   | 0.000   | 0.000   | 0.000   | 0.000  | 0.000   | 0.000   | 0.000   | 0.000   | 0.000   | 0.000   | 0.000   |   |
| 5D   | AX-95152512  | C/C          | 101.534 | 105.867 | 97.058  | 95.624  | 111.747 | 98.458  | 103.909 | 88.765 | 97.633  | 100.312 | 93.109  | 105.978 | 88.693  | 101.976 | 105.249 |   |
|      |              | G/G          | 112.310 | 115.425 | 105.806 | 106.485 | 122.613 | 106.684 | 111.345 | 99.182 | 104.585 | 110.340 | 97.907  | 113.207 | 98.450  | 113.342 | 113.588 |   |
|      |              | P            | 0.002   | 0.002   | 0.009   | 0.000   | 0.001   | 0.006   | 0.004   | 0.001  | 0.013   | 0.001   | 0.033   | 0.010   | 0.001   | 0.001   | 0.010   |   |
| 7B   | AX-111568844 | C/C          | 105.668 | 108.699 | 100.783 | 100.539 | 115.142 | 101.422 | 105.386 | 91.898 | 100.201 | 103.224 | 95.160  | 107.659 | 92.159  | 106.765 | 108.263 |   |
|      |              | T/T          | 98.547  | 104.313 | 94.281  | 91.915  | 109.838 | 96.702  | 103.379 | 87.089 | 95.927  | 98.911  | 91.684  | 105.406 | 86.415  | 98.234  | 103.390 |   |
|      |              | P            | 0.000   | 0.009   | 0.001   | 0.000   | 0.004   | 0.005   | 0.103   | 0.005  | 0.008   | 0.010   | 0.009   | 0.103   | 0.000   | 0.000   | 0.009   |   |
| 7D   | AX-109526545 | A/A          | 101.604 | 106.061 | 97.102  | 96.359  | 111.936 | 98.623  | 103.981 | 89.206 | 97.780  | 100.638 | 93.049  | 106.395 | 88.746  | 102.272 | 105.264 |   |
|      |              | C/C          | 115.270 | 116.252 | 110.667 | 103.292 | 123.148 | 109.740 | 112.837 | 99.059 | 106.548 | 110.590 | 101.712 | 112.433 | 100.711 | 114.423 | 118.570 |   |
|      |              | P            | 0.000   | 0.002   | 0.000   | 0.017   | 0.001   | 0.001   | 0.001   | 0.003  | 0.004   | 0.002   | 0.001   | 0.035   | 0.000   | 0.001   | 0.000   |   |
| SNPP | 3B           | AX-110142073 | C/C     | 13.060  | 10.893  | 9.505   | 14.821  | —       | 5.821   | 9.891  | 7.221   | 6.481   | —       | 7.042   | 4.969   | 11.075  | 6.873   | — |
|      |              | G/G          | 13.599  | 11.365  | 10.753  | 16.586  | —       | 6.222   | 10.128  | 7.492  | 6.515   | —       | 7.450   | 5.128   | 12.043  | 7.382   | —       |   |
|      |              | P            | 0.031   | 0.027   | 0.000   | 0.000   | —       | 0.001   | 0.092   | 0.103  | 0.379   | —       | 0.005   | 0.057   | 0.003   | 0.001   | —       |   |

|    |              |     |        |        |        |        |   |       |        |       |       |   |       |       |        |       |   |
|----|--------------|-----|--------|--------|--------|--------|---|-------|--------|-------|-------|---|-------|-------|--------|-------|---|
| 4A | AX-111600193 | A/A | 13.047 | 10.931 | 9.853  | 15.279 | — | 5.941 | 9.903  | 7.186 | 6.459 | — | 7.248 | 5.013 | 11.281 | 7.004 | — |
|    |              | G/G | 14.253 | 11.748 | 10.755 | 16.888 | — | 6.325 | 10.488 | 7.977 | 6.656 | — | 6.994 | 5.140 | 12.514 | 7.431 | — |
|    |              | P   | 0.002  | 0.006  | 0.020  | 0.011  | — | 0.015 | 0.011  | 0.003 | 0.091 | — | 0.126 | 0.186 | 0.005  | 0.024 | — |
| 5A | AX-110033504 | C/C | 12.671 | 10.623 | 9.221  | 14.568 | — | 5.762 | 9.558  | 6.773 | 6.459 | — | 7.096 | 4.907 | 10.688 | 6.629 | — |
|    |              | T/T | 13.865 | 11.591 | 10.861 | 16.631 | — | 6.263 | 10.461 | 7.895 | 6.537 | — | 7.343 | 5.186 | 12.408 | 7.556 | — |
|    |              | P   | 0.000  | 0.000  | 0.000  | 0.000  | — | 0.000 | 0.000  | 0.000 | 0.228 | — | 0.052 | 0.002 | 0.000  | 0.000 | — |
| 5B | AX-110586945 | C/C | 12.807 | 10.492 | 9.467  | 14.617 | — | 5.788 | 9.716  | 6.991 | 6.392 | — | 7.034 | 4.890 | 10.843 | 6.927 | — |
|    |              | T/T | 13.637 | 11.524 | 10.552 | 16.382 | — | 6.198 | 10.226 | 7.582 | 6.584 | — | 7.350 | 5.170 | 12.127 | 7.259 | — |
|    |              | P   | 0.003  | 0.000  | 0.000  | 0.000  | — | 0.001 | 0.003  | 0.003 | 0.040 | — | 0.023 | 0.004 | 0.000  | 0.021 | — |
| 6B | AX-109084084 | A/A | 14.149 | 11.652 | 11.203 | 17.270 | — | 6.423 | 10.678 | 7.850 | 6.423 | — | 7.325 | 5.314 | 13.061 | 7.916 | — |
|    |              | G/G | 13.029 | 11.032 | 9.839  | 15.331 | — | 5.917 | 9.851  | 7.231 | 6.513 | — | 7.187 | 4.989 | 11.215 | 6.935 | — |
|    |              | P   | 0.001  | 0.015  | 0.000  | 0.001  | — | 0.000 | 0.000  | 0.007 | 0.242 | — | 0.229 | 0.003 | 0.000  | 0.000 | — |
| 7B | AX-89703681  | C/C | 14.077 | 11.755 | 11.365 | 18.152 | — | 6.581 | 10.659 | 7.800 | 6.726 | — | 7.813 | 5.299 | 13.350 | 7.507 | — |
|    |              | T/T | 13.179 | 11.026 | 9.909  | 15.263 | — | 5.927 | 9.913  | 7.268 | 6.443 | — | 7.111 | 5.010 | 11.252 | 7.055 | — |
|    |              | P   | 0.015  | 0.016  | 0.001  | 0.000  | — | 0.000 | 0.002  | 0.036 | 0.029 | — | 0.001 | 0.020 | 0.000  | 0.022 | — |
| 7B | AX-109306202 | C/C | 14.194 | 12.009 | 11.015 | 16.949 | — | 6.477 | 10.491 | 8.026 | 6.768 | — | 7.442 | 5.212 | 12.746 | 7.474 | — |
|    |              | G/G | 12.979 | 10.819 | 9.822  | 15.333 | — | 5.868 | 9.884  | 7.106 | 6.404 | — | 7.134 | 4.988 | 11.198 | 6.997 | — |
|    |              | P   | 0.000  | 0.000  | 0.000  | 0.002  | — | 0.000 | 0.001  | 0.000 | 0.001 | — | 0.037 | 0.023 | 0.000  | 0.003 | — |
| 7D | AX-110913995 | C/C | 14.411 | 11.957 | 11.203 | 17.488 | — | 6.432 | 10.736 | 7.991 | 6.585 | — | 7.383 | 5.397 | 12.968 | 7.940 | — |
|    |              | T/T | 12.501 | 10.469 | 9.211  | 14.314 | — | 5.741 | 9.487  | 6.825 | 6.439 | — | 7.087 | 4.804 | 10.550 | 6.544 | — |
|    |              | P   | 0.000  | 0.000  | 0.000  | 0.000  | — | 0.000 | 0.000  | 0.000 | 0.089 | — | 0.029 | 0.000 | 0.000  | 0.000 | — |
| 7D | AX-110967909 | C/C | 14.484 | 11.946 | 11.327 | 17.661 | — | 6.464 | 10.796 | 8.052 | 6.607 | — | 7.491 | 5.392 | 13.237 | 7.963 | — |
|    |              | T/T | 12.581 | 10.603 | 9.319  | 14.506 | — | 5.765 | 9.555  | 6.875 | 6.466 | — | 7.059 | 4.844 | 10.544 | 6.618 | — |
|    |              | P   | 0.000  | 0.000  | 0.000  | 0.000  | — | 0.000 | 0.000  | 0.000 | 0.102 | — | 0.003 | 0.000 | 0.000  | 0.000 | — |

TKW, 1000-kernel weight; KNS, kernel number per spike; TSNS, total spikelet number per spike; GWS, grain weight per spike; PH, plant height; SNPP, spike number per plant. ‘—’, indicated that data were missing

**TABLE S8** Cultivars with more than 20 favorable alleles and their traits.

| Accession No. | Name               | No of superior alleles | FSNS  | TKW   | KNS   | GWS  | SL    | TSNS  | SNPP  | PH     |
|---------------|--------------------|------------------------|-------|-------|-------|------|-------|-------|-------|--------|
| ZM009469      | Zhengzhou683       | 30                     | 19.06 | 44.34 | 50.66 | 2.29 | 8.53  | 20.19 | 7.52  | 103.13 |
| ZM014971      | Suzhou7829         | 29                     | 17.68 | 42.14 | 49.32 | 2.11 | 9.17  | 19.08 | 7.63  | 96.45  |
| ZM009825      | Longchun7          | 28                     | 18.65 | 42.36 | 56.40 | 2.42 | 10.40 | 20.09 | 7.25  | 111.28 |
| ZM014848      | Ningmai6           | 28                     | 18.43 | 37.66 | 52.37 | 1.98 | 8.07  | 20.15 | 8.62  | 81.87  |
| ZM016966      | Yunmai35           | 28                     | 19.81 | 40.98 | 49.92 | 2.11 | 9.44  | 20.75 | 8.56  | 119.95 |
| ZM015139      | Zhen7630           | 28                     | 16.87 | 42.27 | 46.08 | 1.97 | 7.59  | 18.07 | 7.73  | 85.78  |
| ZM010516      | Wanya2             | 27                     | 17.84 | 38.97 | 50.35 | 1.97 | 9.46  | 19.02 | 6.93  | 89.27  |
| ZM016677      | Chuan533           | 26                     | 18.56 | 40.31 | 48.20 | 1.97 | 7.46  | 19.43 | 8.73  | 96.02  |
| ZM016678      | Chuan578           | 26                     | 17.51 | 44.40 | 47.06 | 2.11 | 9.00  | 18.72 | 8.98  | 91.31  |
| ZM016373      | E31846             | 26                     | 17.64 | 39.98 | 52.69 | 2.13 | 9.10  | 17.62 | 6.68  | 89.91  |
| ZM009927      | Linmai7            | 26                     | 17.39 | 43.37 | 47.49 | 2.10 | 10.27 | 19.32 | 7.54  | 107.85 |
| ZM026716      | Yangmai15          | 26                     | 18.25 | 45.84 | 47.92 | 2.22 | 7.80  | 19.37 | 8.10  | 70.94  |
| MY003143      | Wilhelmina         | 25                     | 21.83 | 28.75 | 44.63 | 1.25 | 9.25  | 23.60 | 8.96  | 118.43 |
| ZM016876      | Bimai6             | 25                     | 20.28 | 35.23 | 50.36 | 1.82 | 9.58  | 21.57 | 9.73  | 83.74  |
| ZM018320      | Gan(39)-2          | 25                     | 20.69 | 42.76 | 59.99 | 2.62 | 10.71 | 21.48 | 6.31  | 107.19 |
| ZM009708      | Kehan2             | 25                     | 19.13 | 34.81 | 41.64 | 1.54 | 12.05 | 22.27 | 10.98 | 132.68 |
| ZM009924      | Linmai4            | 25                     | 17.52 | 41.43 | 49.10 | 2.10 | 10.62 | 18.97 | 8.21  | 108.73 |
| ZM009909      | Linnong12          | 25                     | 19.69 | 39.55 | 59.30 | 2.41 | 9.88  | 20.91 | 7.22  | 100.82 |
| ZM022994      | Nanzhao76144-0-6-1 | 25                     | 18.39 | 38.80 | 50.78 | 1.98 | 8.26  | 19.26 | 7.48  | 84.34  |
| ZM010194      | Ningmai3           | 25                     | 19.16 | 35.79 | 57.10 | 2.09 | 9.00  | 19.95 | 8.22  | 89.39  |
| ZM017206      | Shannong21-24      | 25                     | 19.50 | 32.89 | 57.29 | 1.94 | 9.26  | 21.37 | 8.30  | 120.65 |
| ZM010478      | Xichang662         | 25                     | 18.48 | 35.23 | 59.08 | 2.14 | 11.02 | 19.26 | 7.60  | 109.18 |
| ZM026713      | Yangmai12          | 25                     | 18.50 | 41.75 | 48.83 | 2.05 | 9.37  | 20.06 | 9.24  | 84.80  |
| ZM026715      | Yangmai14          | 25                     | 17.31 | 45.01 | 47.01 | 2.13 | 9.65  | 18.46 | 7.87  | 81.37  |
| ZM014902      | Yangmai4           | 25                     | 18.13 | 42.11 | 50.51 | 2.18 | 8.28  | 19.38 | 7.31  | 96.00  |
| ZM009472      | Zhengyin1          | 25                     | 18.11 | 37.04 | 52.95 | 2.00 | 8.83  | 19.11 | 8.30  | 89.21  |
| ZM009465      | Zhengzhou17        | 25                     | 19.21 | 41.98 | 54.52 | 2.35 | 9.63  | 20.64 | 7.52  | 115.62 |
| ZM009580      | Zhuyeqing(white)   | 25                     | 17.91 | 37.60 | 48.08 | 1.87 | 8.77  | 19.66 | 9.15  | 116.71 |
| ZM023194      | Chuan80-466        | 24                     | 19.86 | 42.20 | 50.78 | 2.20 | 9.04  | 21.02 | 8.56  | 86.07  |
| ZM016503      | Emai9              | 24                     | 18.40 | 43.09 | 53.25 | 2.34 | 9.46  | 19.12 | 7.80  | 106.80 |
| ZM017265      | Gan81(39)-2-7      | 24                     | 20.54 | 42.31 | 60.00 | 2.64 | 11.06 | 21.51 | 6.54  | 110.95 |
| ZM010319      | Huamai7            | 24                     | 17.85 | 40.51 | 43.40 | 1.81 | 9.75  | 19.44 | 8.93  | 109.38 |
| ZM022203      | Jurong03           | 24                     | 17.73 | 38.67 | 46.14 | 1.80 | 8.39  | 18.68 | 8.41  | 81.04  |
| ZM009502      | Kaifeng10          | 24                     | 19.75 | 39.12 | 49.44 | 1.98 | 7.35  | 20.84 | 8.65  | 105.06 |
| ZM009719      | Kezhen             | 24                     | 21.41 | 28.58 | 55.94 | 1.64 | 14.19 | 24.75 | 8.51  | 132.46 |
| ZM009907      | Linmai5            | 24                     | -     | 40.10 | 64.90 | 2.60 | 12.60 | 21.20 | 13.70 | 126.90 |
| ZM009908      | Linnong11          | 24                     | 20.01 | 38.65 | 61.55 | 2.41 | 9.17  | 21.32 | 6.54  | 98.60  |
| ZM009910      | Linnong13          | 24                     | 20.21 | 39.48 | 56.24 | 2.25 | 9.46  | 21.27 | 7.86  | 107.79 |
| ZM009905      | Linnong1           | 24                     | 18.69 | 40.24 | 52.84 | 2.17 | 11.17 | 20.15 | 7.18  | 110.92 |
| ZM009906      | Linnong2           | 24                     | 18.92 | 37.40 | 52.82 | 2.02 | 10.26 | 20.46 | 8.42  | 107.61 |
| ZM009494      | Mengxian2          | 24                     | 18.88 | 38.45 | 54.29 | 2.12 | 8.63  | 20.08 | 9.41  | 70.97  |

|          |                 |    |       |       |       |      |       |       |       |        |
|----------|-----------------|----|-------|-------|-------|------|-------|-------|-------|--------|
| ZM010392 | Ningmai1        | 24 | 18.77 | 36.49 | 48.45 | 1.83 | 10.03 | 20.40 | 8.48  | 113.93 |
| ZM022235 | Yangmai158      | 24 | 17.56 | 43.87 | 51.22 | 2.27 | 9.09  | 18.61 | 7.82  | 86.80  |
| ZM026717 | Yangmai16       | 24 | 19.22 | 43.68 | 56.76 | 2.50 | 9.43  | 20.27 | 7.77  | 82.48  |
| ZM026718 | Yangmai17       | 24 | 18.26 | 37.74 | 52.02 | 1.96 | 9.45  | 19.56 | 9.65  | 86.32  |
| ZM010480 | Youyimai        | 24 | 19.36 | 33.84 | 50.54 | 1.73 | 9.05  | 20.79 | 10.01 | 79.90  |
| ZM010547 | Yunmai27        | 24 | 19.85 | 38.52 | 50.29 | 1.99 | 9.93  | 21.47 | 8.87  | 103.37 |
| MY000161 | Abbondanza      | 23 | 18.41 | 41.41 | 50.26 | 2.08 | 10.87 | 19.98 | 8.78  | 115.01 |
| ZM015488 | Ai73            | 23 | 19.70 | 29.81 | 60.38 | 1.83 | 9.65  | 21.24 | 8.35  | 94.05  |
| ZM010197 | Aiganzao        | 23 | 17.54 | 34.15 | 49.09 | 1.70 | 6.54  | 18.68 | 9.15  | 99.18  |
| ZM010450 | Fan6            | 23 | 20.64 | 34.43 | 59.63 | 2.10 | 7.41  | 20.64 | 8.54  | 85.62  |
| ZM022851 | Guangyang821    | 23 | 18.51 | 42.38 | 52.55 | 2.27 | 9.09  | 19.58 | 7.73  | 82.06  |
| ZM008937 | Jinghong9       | 23 | 17.99 | 32.15 | 48.01 | 1.59 | 10.02 | 19.62 | 9.59  | 109.11 |
| ZM009926 | Linmai6         | 23 | 19.81 | 37.31 | 60.81 | 2.31 | 10.06 | 20.77 | 6.86  | 110.28 |
| ZM009911 | Linnong14       | 23 | 20.99 | 38.81 | 63.36 | 2.54 | 9.75  | 21.26 | 6.96  | 105.42 |
| ZM022052 | Long90-05634    | 23 | 20.89 | 28.29 | 51.21 | 1.45 | 12.65 | 22.66 | 9.41  | 117.03 |
| ZM010464 | Mianyang4       | 23 | 19.57 | 34.02 | 54.13 | 1.86 | 9.86  | 20.86 | 8.11  | 110.84 |
| ZM010589 | Rikaze8         | 23 | 17.86 | 36.43 | 42.46 | 1.59 | 9.53  | 19.66 | 9.17  | 117.05 |
| ZM017165 | Shan6815-0-2-3  | 23 | 15.98 | 38.22 | 44.63 | 1.73 | 10.00 | 17.19 | 10.80 | 87.93  |
| ZM009492 | Shicha15        | 23 | 19.22 | 42.31 | 48.83 | 2.11 | 10.33 | 20.84 | 7.72  | 85.51  |
| ZM014926 | Suyang8-1-2     | 23 | 19.28 | 38.13 | 56.31 | 2.17 | 9.23  | 20.72 | 8.44  | 91.45  |
| ZM009189 | Taiyuan567      | 23 | 17.97 | 39.93 | 44.94 | 1.83 | 7.46  | 19.86 | 10.06 | 82.42  |
| ZM017079 | Xiaoyan6        | 23 | 17.42 | 39.29 | 40.61 | 1.62 | 7.56  | 19.60 | 11.10 | 95.61  |
| ZM016194 | Xuchang26       | 23 | 18.96 | 46.09 | 53.13 | 2.48 | 10.37 | 20.37 | 7.35  | 114.66 |
| ZM026711 | Yangmai10       | 23 | 19.22 | 43.51 | 57.88 | 2.56 | 9.70  | 20.27 | 7.73  | 81.95  |
| ZM026712 | Yangmai11       | 23 | 17.87 | 45.43 | 48.55 | 2.31 | 8.65  | 19.32 | 8.15  | 86.06  |
| ZM026714 | Yangmai13       | 23 | 19.25 | 40.00 | 58.64 | 2.36 | 10.47 | 20.04 | 7.37  | 77.55  |
| ZM025137 | Yangmai9        | 23 | 19.15 | 40.93 | 50.78 | 2.09 | 8.94  | 20.11 | 9.45  | 74.95  |
| ZM010545 | Yunmai25        | 23 | 20.30 | 38.77 | 53.45 | 2.12 | 8.50  | 21.44 | 7.57  | 104.02 |
|          | Zhengyin4       | 23 | 19.14 | 34.20 | 48.40 | 1.69 | 8.01  | 20.61 | 10.08 | 78.66  |
| ZM009470 | Zhengzhou722    | 23 | 18.56 | 40.80 | 51.92 | 2.15 | 8.05  | 19.92 | 8.40  | 91.16  |
| ZM009471 | Zhengzhou742    | 23 | 18.11 | 42.55 | 54.24 | 2.31 | 9.70  | 19.81 | 7.64  | 86.59  |
| ZM009977 | Zhongliang11    | 23 | 19.62 | 34.73 | 49.96 | 1.78 | 10.09 | 21.04 | 11.44 | 124.90 |
| ZM009581 | Zhuyeqing (red) | 23 | 17.40 | 37.23 | 46.25 | 1.75 | 8.36  | 19.26 | 9.05  | 113.40 |
| MY001212 | Heine Hvede     | 22 | 20.92 | 34.27 | 46.64 | 1.66 | 8.97  | 23.48 | 9.38  | 108.18 |
| ZM010370 | Baimangmai      | 22 | 17.71 | 43.50 | 45.41 | 2.02 | 8.37  | 19.14 | 8.58  | 111.80 |
| ZM016378 | E34963          | 22 | 17.92 | 35.10 | 52.36 | 1.87 | 10.18 | 19.55 | 9.07  | 95.64  |
| ZM010314 | Emai6           | 22 | 18.53 | 40.28 | 51.81 | 2.16 | 8.84  | 19.72 | 9.35  | 110.33 |
| ZM015557 | Fufan16         | 22 | 19.77 | 40.61 | 60.26 | 2.47 | 9.15  | 20.75 | 6.64  | 99.64  |
| ZM010327 | Jingzhou1       | 22 | 18.19 | 41.44 | 46.89 | 1.99 | 10.91 | 20.18 | 8.24  | 119.27 |
| ZM010332 | Jingzhou66      | 22 | 19.10 | 37.35 | 47.65 | 1.82 | 9.99  | 20.21 | 8.51  | 112.64 |
| ZM009506 | Kaizhong70-18   | 22 | 18.99 | 44.82 | 45.50 | 2.09 | 8.36  | 20.36 | 8.04  | 96.89  |
| ZM014681 | Kehan9          | 22 | 18.65 | 31.66 | 40.63 | 1.32 | 11.67 | 21.23 | 9.28  | 125.32 |
| ZM010211 | Nanda8          | 22 | 17.84 | 38.35 | 44.46 | 1.74 | 8.12  | 18.61 | 8.83  | 102.46 |
| ZM009526 | Neixiang173     | 22 | 17.60 | 39.09 | 46.93 | 1.86 | 7.44  | 18.98 | 8.67  | 89.94  |

|          |                     |    |       |       |       |      |       |       |       |        |
|----------|---------------------|----|-------|-------|-------|------|-------|-------|-------|--------|
| ZM026690 | Ningmai8            | 22 | 19.97 | 38.00 | 55.53 | 2.20 | 8.55  | 20.67 | 6.97  | 71.19  |
| ZM024772 | Shanyou225          | 22 | 17.92 | 38.87 | 44.93 | 1.75 | 8.00  | 19.18 | 8.76  | 77.62  |
| ZM010490 | Shuwan8             | 22 | 19.79 | 37.47 | 50.04 | 1.96 | 8.94  | 20.51 | 8.04  | 107.24 |
| ZM010306 | Wannian2            | 22 | 17.66 | 36.73 | 45.69 | 1.73 | 9.59  | 19.22 | 8.45  | 117.58 |
| ZM010243 | Wangmai15           | 22 | 19.07 | 36.43 | 47.65 | 1.80 | 10.21 | 20.13 | 9.14  | 125.39 |
| ZM017209 | Xiannong151         | 22 | 17.87 | 37.44 | 53.34 | 2.02 | 8.77  | 19.22 | 8.22  | 77.39  |
| ZM009508 | Xinzheng1           | 22 | 18.17 | 34.83 | 48.13 | 1.74 | 7.12  | 19.43 | 7.83  | 93.10  |
| ZM016120 | Yu30691-3-6 (white) | 22 | 17.73 | 37.79 | 53.34 | 2.07 | 10.47 | 19.45 | 9.29  | 89.43  |
|          | Yuanfeng175         | 22 | 18.85 | 38.09 | 49.06 | 1.87 | 7.49  | 20.05 | 8.24  | 73.75  |
| ZM015988 | Zhengzhou741        | 22 | 18.47 | 38.79 | 54.60 | 2.12 | 8.76  | 19.81 | 8.18  | 78.71  |
| ZM015989 | Zhengzhou761        | 22 | 18.16 | 39.36 | 43.05 | 1.70 | 8.02  | 19.10 | 8.52  | 76.12  |
| MY001072 | Funo                | 21 | 19.48 | 34.98 | 54.33 | 1.93 | 8.84  | 21.04 | 9.31  | 99.20  |
| ZM016703 | Chuan78001          | 21 | 19.01 | 38.19 | 54.12 | 2.04 | 8.02  | 19.69 | 7.31  | 73.35  |
| ZM016330 | E1161               | 21 | 18.61 | 38.94 | 52.31 | 2.08 | 8.27  | 19.60 | 7.25  | 92.55  |
| ZM024056 | Fengqiang7          | 21 | 18.86 | 38.56 | 47.28 | 1.91 | 11.93 | 20.17 | 8.38  | 123.20 |
| ZM009802 | Ganmai7             | 21 | 18.32 | 39.55 | 52.43 | 2.12 | 10.27 | 19.60 | 7.38  | 117.34 |
| ZM022170 | Hei86-30            | 21 | 18.92 | 31.66 | 52.54 | 1.68 | 12.65 | 20.96 | 9.72  | 115.66 |
| ZM015946 | Huapei126           | 21 | 19.44 | 44.32 | 50.40 | 2.26 | 9.68  | 20.67 | 8.41  | 96.84  |
| ZM015948 | Huapei128           | 21 | 20.58 | 30.15 | 59.20 | 1.82 | 10.28 | 22.03 | 8.83  | 70.06  |
| ZM015126 | Jian37              | 21 | 20.19 | 37.42 | 58.57 | 2.21 | 9.58  | 20.77 | 7.29  | 97.58  |
| ZM011384 | Jinguangmai         | 21 | 19.34 | 38.18 | 46.10 | 1.76 | 11.64 | 21.20 | 9.54  | 113.85 |
| ZM015036 | Jinling1            | 21 | 17.76 | 35.22 | 48.69 | 1.74 | 8.04  | 19.02 | 10.21 | 79.17  |
| ZM010374 | Jinmai33            | 21 | 19.19 | 37.39 | 53.41 | 2.01 | 9.79  | 20.65 | 8.02  | 99.18  |
| ZM022722 | Lumai17             | 21 | 16.61 | 45.55 | 39.55 | 1.84 | 10.18 | 18.27 | 10.46 | 94.95  |
| MY002004 | Mexipak66           | 21 | 18.84 | 30.79 | 59.76 | 1.93 | 10.37 | 20.24 | 8.58  | 93.63  |
| ZM017138 | Shan5860-19-2-2     | 21 | 20.22 | 36.19 | 50.14 | 1.86 | 9.06  | 21.89 | 8.87  | 118.96 |
| ZM017162 | Shan6801-3-1-1      | 21 | 17.22 | 39.37 | 45.23 | 1.79 | 9.96  | 19.64 | 8.94  | 82.76  |
| ZM017180 | Shan7587-1/81       | 21 | 19.13 | 38.75 | 56.33 | 2.22 | 8.95  | 20.29 | 10.13 | 88.88  |
| ZM009520 | Suinong3            | 21 | 18.21 | 39.00 | 51.47 | 2.04 | 7.60  | 19.40 | 8.33  | 90.28  |
| ZM009616 | Xianfeng68          | 21 | 20.00 | 31.90 | 58.42 | 1.88 | 7.21  | 20.97 | 8.56  | 83.50  |
| ZM016512 | Xiangmai5           | 21 | 18.61 | 39.04 | 53.13 | 2.07 | 8.82  | 19.95 | 8.18  | 83.42  |
| ZM010221 | Xinfeng13           | 21 | 18.30 | 33.91 | 55.51 | 1.87 | 8.10  | 19.19 | 8.24  | 96.30  |
| ZM009528 | Xinyang12           | 21 | 18.72 | 39.87 | 51.33 | 2.10 | 10.26 | 19.77 | 8.65  | 111.02 |
| ZM017950 | Xinyang1            | 21 | 17.89 | 37.70 | 47.53 | 1.84 | 7.65  | 19.13 | 9.07  | 113.66 |
| ZM015104 | Xuzhou20            | 21 | 19.47 | 39.70 | 54.03 | 2.16 | 8.77  | 19.88 | 8.32  | 83.31  |
| ZM025075 | Yang92-90           | 21 | 18.80 | 39.30 | 50.86 | 2.03 | 8.03  | 20.53 | 6.98  | 88.95  |
|          | Zhengmai9023        | 21 | 16.46 | 46.87 | 42.74 | 2.00 | 9.84  | 18.83 | 8.27  | 77.37  |
| ZM015995 | Zhengzhou6811       | 21 | 18.81 | 43.05 | 53.26 | 2.38 | 9.37  | 20.31 | 9.37  | 119.53 |
| ZM017939 | Zhengzhou743        | 21 | 18.07 | 41.48 | 51.87 | 2.22 | 9.62  | 19.57 | 7.62  | 86.84  |

SL, spike length; TKW, 1000-kernel weight; KNS, kernel number per spike; TSNS, total spikelet number per spike; FSNS, fertile spikelet number per spike; GWS, grain weight per spike; PH, plant height; SNPP, spike number per plant. ‘-’, indicated that data were missing
